1 **MYBL2 regulates ATM to control replication initiation and prevent replication stress in**  
2 **pluripotent stem cells**

3

4 Daniel Blakemore<sup>1</sup>, Nuria Vilaplana<sup>1</sup>, Ruba Almaghrabi<sup>1</sup>, Elena Gonzalez<sup>1</sup>, Miriam Moya<sup>1</sup>,  
5 Carl Ward<sup>2,3</sup>, George Murphy<sup>4</sup>, Agnieszka Gambus<sup>1</sup>, Eva Petermann<sup>1</sup>, Grant S. Stewart<sup>1,5</sup>,  
6 Paloma García<sup>1,5\*</sup>

7

8 <sup>1</sup>Institute of Cancer and Genomic Science, College of Medical and Dental Sciences, University of  
9 Birmingham, UK;

10 <sup>2</sup>Laboratory of Integrative Biology, Guangzhou Institutes of Biomedicine and Health, Chinese  
11 Academy of Sciences (CAS), Guangzhou, China. <sup>3</sup>Chinese Academy of Sciences (CAS), Key Laboratory  
12 of Regenerative Biology and Guangdong Provincial Key Laboratory of Stem Cell and regenerative  
13 Medicine, Guangzhou Institutes of Biomedicine and Health, Guangzhou, 510530, China.

14 <sup>4</sup>Department of Medicine, Boston University School of Medicine, Boston, Massachusetts, USA.

15 <sup>5</sup>Co-senior authors

16

17

18 \* Corresponding author [p.garcia@bham.ac.uk](mailto:p.garcia@bham.ac.uk)

19

20 **Summary**

21 Replication stress, a major cause of genome instability in cycling cells, is mainly prevented  
22 by the ATR-dependent replication stress response pathway in somatic cells. However, the  
23 replication stress response pathway in embryonic stem cells (ESCs) may be substantially  
24 different due to alterations in cell cycle phase length. The transcription factor MYBL2, which  
25 is implicated in cell cycle regulation, is expressed between hundred to thousand-fold more  
26 highly in ESCs compared to somatic cells. Here we show that MYBL2 functions to activate  
27 ATM and suppress replication stress in ESCs. Consequently, loss of MYBL2 or inhibition of  
28 ATM or Mre11 in ESCs, results in replication fork slowing, increased fork stalling and  
29 elevated origin firing. Additionally, we demonstrate that inhibition of CDC7 activity rescues  
30 replication stress induced by MYBL2 loss and ATM inhibition, suggesting that uncontrolled  
31 new origin firing may underlie the replication stress phenotype resulting from loss/inhibition  
32 of MYBL2 and ATM. Overall, this study proposes that in addition to ATR, a MYBL2-MRN-  
33 ATM replication stress response pathway functions in ESCs to control DNA replication  
34 initiation and prevent genome instability.

35

## 36 **Introduction**

37 DNA replication is a highly complex process that requires tight regulation to ensure that  
38 genome stability is maintained. Obstacles to DNA replication activate the replication stress  
39 response pathway, which not only functions to ensure that the initiation of DNA replication  
40 and progression through the cell cycle progression are suppressed, but also acts to facilitate  
41 the repair and restart of damaged replication forks (Aguilera and Gomez-Gonzalez, 2008;  
42 Bartek et al., 2004) (Zeman and Cimprich, 2014).

43

44 Two main serine/threonine protein kinases are responsible for controlling the cellular  
45 response to genetic damage and impediments to DNA replication: ataxia-telangiectasia  
46 mutated (ATM) and ataxia-telangiectasia and Rad3 related (ATR). ATR is activated following  
47 its recruitment to RPA coated ssDNA, a common intermediate that occurs during normal  
48 DNA replication and also as a consequence of replication stress. It has been shown that  
49 ATR is essential for the survival of proliferating cells as its loss is embryonic lethal (de Klein  
50 et al., 2000). In contrast, ATM is recruited by the MRN complex to DNA ends and is primarily  
51 associated with signalling the presence of DNA double-strand breaks (DSB) (Bakkenist and  
52 Kastan, 2003; Khanna et al., 2001; Valerie and Povirk, 2003). Activation of the ATR kinase  
53 during replication leads to the phosphorylation and activation of the CHK1 kinase, which  
54 functions to suppress new replication origin firing (Guo et al., 2000; Liu et al., 2000;  
55 Moiseeva et al., 2019), promote fork stability and prevent premature entry into mitosis  
56 (Cimprich and Cortez, 2008). In contrast, it is thought that ATM is activated during S-phase  
57 only upon MRN-dependent recruitment to sites of DSBs i.e. collapsed replication forks  
58 (Bakkenist and Kastan, 2003; Lee and Paull, 2004). However, various studies have  
59 challenged this canonical pathway for ATM activation by demonstrating that its recruitment  
60 and activity is dependent upon chromatin context, indicating that ATM may be capable of  
61 being activated in the absence of DSBs (Bakkenist and Kastan, 2003; Bencokova et al.,  
62 2009; Cam et al., 2010; Ewald et al., 2008; Iwahori et al., 2014; Olcina et al., 2010; Olcina et  
63 al., 2013). Furthermore, studies performed in *Xenopus laevis* egg extracts have indicated a  
64 specific role for ATM in regulating the timing of replication (Marheineke and Hyrien, 2004;  
65 Shechter et al., 2004). Therefore, it has been hypothesised that ATM could have additional  
66 roles in replication control, specifically in non-somatic cell types.

67

68 In embryonic stem cells (ESC), safeguarding genome stability during DNA replication is of  
69 extreme importance as alterations to the genome will be transmitted to their differentiated  
70 daughter cells during development, potentially compromising tissue integrity and function.  
71 ESCs proliferate very rapidly and possess an atypical cell cycle with short GAP phases and  
72 a weak G1-S checkpoint (Ballabeni et al., 2011; Coronado et al., 2013; Kapinas et al., 2013;

73 Savatier et al., 1994). It has been suggested that mESCs may contain a significant fraction  
74 of unreplicated DNA as they enter mitosis (Ahuja et al., 2016). Nevertheless, despite these  
75 traits, pluripotent stem cells actually have a very low mutation rate (Cervantes et al., 2002;  
76 Fujii-Yamamoto et al., 2005; Kapinas et al., 2013) and maintain genome stability more  
77 efficiently than somatic cell types (Ahuja et al., 2016; Kapinas et al., 2013; Murga et al.,  
78 2007; Zhao et al., 2015). However, how these cells retain such a low mutational rate in the  
79 presence of high levels of endogenous replication stress is still not properly understood.

80

81 One protein that is unusually highly expressed in ESCs and key for genome stability is the  
82 transcription factor MYBL2 (alias, B-MYB) (Lorvellec et al., 2010; Sitzmann et al., 1996;  
83 Tarasov et al., 2008). Similar to ATR, targeted disruption of MYBL2 leads to early embryonic  
84 lethality (Tanaka et al., 1999). MYBL2 has been shown to be important for transactivating  
85 the promoters of genes responsible for regulating the G2/M transition (Knight et al., 2009;  
86 Lorvellec et al., 2010; Osterloh et al., 2007; Tarasov et al., 2008; Wolter et al., 2017). More  
87 specifically, the MuvB core cooperates with MYBL2 to recruit FOXM1 to the promoters of  
88 specific genes, such as Cyclin B, survivin and CDC25 phosphatase, which are responsible  
89 for mediating G2–M checkpoint control (Down et al., 2012; Lefebvre et al., 2010; Martinez  
90 and Dimaio, 2011; Sadasivam and DeCaprio, 2013; Sadasivam et al., 2012). In addition to  
91 this, a recent study identified a signalling axis, involving ATR-CDK1-FOXM1 and  
92 demonstrated that it cooperates with MYBL2 to govern the proper exit from S-phase into G2  
93 (Saldivar et al., 2018). Moreover, it has also been shown that YAP, a component of the  
94 HIPPO signalling pathway, interacts with the MYBL2-MuvB complex to influence the  
95 expression of genes important for mitosis (Pattschull et al., 2019). Whilst the ability of  
96 MYBL2 to act as a transcription is critical for cell cycle regulation, our previous work in ESCs  
97 has highlighted the importance of MYBL2 for maintaining normal replication fork progression  
98 under unperturbed conditions, as stem cells lacking MYBL2 displayed a significantly  
99 reduction in replication fork speed (Lorvellec et al., 2010). However, whether this replication  
100 phenotype is caused by dysfunction of the ATR-CDK1-FOXM1 axis or aberrant regulation of  
101 YAP-dependent gene transcription remains unknown. Here, we demonstrate that the  
102 replication stress caused by loss of MYBL2 in ESCs is epistatic with loss of Mre11 or ATM  
103 function and can be rescued by suppressing origin firing via inhibition of CDC7. This  
104 suggests that uncontrolled replication initiation underlies the replication stress phenotype  
105 exhibited by cells lacking MYBL2 and that it is not caused by alterations in the expression of  
106 genes involved in controlling the cell cycle. Taken together, this work identifies ATM as a  
107 critical regulator of origin firing in pluripotent stem cells and highlights the importance of  
108 MYBL2-ATM in controlling the initiation of origin firing and the replication stress response in  
109 these cells.

110

111

## 112 Results

### 113 ***Mybl2*<sup>ΔΔ</sup> ESCs display a replication stress phenotype characterized by a decrease in** 114 **replication fork speed and an increase in replication fork instability.**

115 Consistent with our previous work (Lorvellec et al., 2010), DNA fibre analysis revealed that  
116 replication fork progression was significantly reduced in *Mybl2*<sup>ΔΔ</sup> ESCs compared to a WT  
117 counterpart, with a 65% reduction in the median replication fork speed (Figure 1A and  
118 EV1A). Analysis of the relative percentage of different replication structures revealed a  
119 notable decrease in the percentage of elongating forks in the *Mybl2*<sup>ΔΔ</sup> ESCs compared to  
120 *Mybl2*<sup>+/+</sup> ESCs (Figure EV1B and EV1C). This reduction in actively elongating replication  
121 fork structures was associated with an increase in fork stalling and new origin firing, the latter  
122 of which is a known compensation mechanism invoked to counteract a reduction in the  
123 cellular replicative capacity (Figure EV1D and EV1E).

124

125 To further investigate potential changes in the kinetics of replication fork progression, the  
126 ratio of first and second label replication tracks of elongating forks was calculated as a  
127 measure of replication fork stability (Maya-Mendoza et al., 2018). An increase in the ratio  
128 with respect to wild type cells suggests a disruption of continuous fork progression due to  
129 increased fork instability. Notably, the *Mybl2*<sup>ΔΔ</sup> ESCs exhibited a significant increase in  
130 replication fork instability compared to *Mybl2*<sup>+/+</sup> ESCs (Figure 1B). In keeping with this  
131 observation, *Mybl2*<sup>ΔΔ</sup> ESCs also displayed a strong asymmetry phenotype of newly fired  
132 replication forks initiating from the same origin when compared to *Mybl2*<sup>+/+</sup> ESCs (Figure  
133 1C). This indicates that MYBL2 plays a critical role in maintaining replication fork stability in  
134 the absence of exposure to any exogenous genotoxins.

135

136 It is known that prolonged replication stress leads to the formation of ultra-fine bridges  
137 (UFBs) between separating sister chromatids in anaphase due to the presence of under-  
138 replicated DNA (Chan et al., 2018). To investigate whether loss of MYBL2 leads to increased  
139 UFBs, immunofluorescence staining using an antibody to PICH, a DNA translocase known  
140 to coat ultra-fine bridges during anaphase (Baumann et al., 2007; Chan and Hickson, 2011)  
141 was carried out on asynchronous *Mybl2*<sup>+/+</sup> and *Mybl2*<sup>ΔΔ</sup> ESCs. In the *Mybl2*<sup>+/+</sup> ESCs, 20% of  
142 anaphases exhibited UFBs, which is comparable to levels previously observed for normal  
143 stem cells (Broderick et al., 2015; Hengeveld et al., 2015; Saldivar et al., 2018). Strikingly,  
144 there was a significant increase (60%) in the percentage of UFB positive anaphases in the  
145 *Mybl2*<sup>ΔΔ</sup> compared to *Mybl2*<sup>+/+</sup> ESCs (Figure 1D). Overall, these data build upon our

146 previous findings and strongly demonstrate that MYBL2 loss in ESCs culminates in chronic  
147 replication stress leading to under-replicated DNA passing into mitosis.

148

#### 149 ***Mybl2*<sup>ΔΔ</sup> ESCs exhibit increased replication-associated genome instability**

150 Cells under chronic replication stress exhibit elevated levels of DNA damage that can be  
151 partly attributed to an increase in stalled forks, which if left unresolved, are vulnerable to  
152 collapse into double strand breaks (DSBs) (Petermann et al., 2010; Zeman and Cimprich,  
153 2014). Therefore, to determine whether the increased replication stress present in MYBL2  
154 deficient ESCs resulted in more replication-associated DNA breakage, total DNA breaks  
155 were quantified using an alkaline comet assay (Ostling and Johanson, 1984; Singh et al.,  
156 1988). Exposure of cells to camptothecin (CPT), a genotoxic agents known to induce  
157 replication-associated DNA breakage was used a positive control. Notably, the *Mybl2*<sup>ΔΔ</sup>  
158 ESCs exhibited significantly increased levels of spontaneous DNA breakage as measured  
159 by the average olive tail moment (OTM) when compared to the *Mybl2*<sup>+/+</sup> ESCs (Figure 1E  
160 and 1F). Whilst the exposure of ESCs to CPT elevated the DNA breakage to a level that was  
161 not significantly different between the two genotypes.

162

163 To ascertain whether the increase in OTM in *Mybl2*<sup>ΔΔ</sup> ESCs was due to DSB formation  
164 during replication, immunofluorescence was performed using 53BP1 and EdU as markers of  
165 DSBs and cells in S-phase respectively. Again, exposure to CPT was used as a positive  
166 control for replication-associated DNA breakage. We observed a two-fold increase in the  
167 percentage of S-phase nuclei displaying more than six 53BP1 foci in *Mybl2*<sup>ΔΔ</sup> cells (EdU  
168 positive) when compared to the *Mybl2*<sup>+/+</sup> ESCs (Figure 1G and Appendix Figure S1). As  
169 expected, in response to CPT treatment, both the *Mybl2*<sup>+/+</sup> and *Mybl2*<sup>ΔΔ</sup> ESCs exhibited a  
170 large increase in the percentage of cells with over six 53BP1 foci. These findings suggest  
171 that the increased spontaneous DNA damage in the *Mybl2*<sup>ΔΔ</sup> ESCs most likely arises as a  
172 consequence of replication fork collapse.

173

#### 174 ***Mybl2*<sup>ΔΔ</sup> ESC fail to activate the DNA damage-activated, G2/M cell cycle checkpoint**

175 Given that *Mybl2*<sup>ΔΔ</sup> ESCs show signs of chronic replication stress (Figure 1A-C) leading to  
176 unreplicated DNA (Figure 1D) and DNA breakage (Figure 1E-F), it would be expected that  
177 these cells would arrest in S- or G2-phase of the cell cycle due to prolonged activation of the  
178 DNA damage checkpoint response (Zeman and Cimprich, 2014). Interestingly however,  
179 *Mybl2*<sup>ΔΔ</sup> ESCs still retain the capacity to proliferate even in the presence of DNA damage.  
180 Since MYBL2 has been shown to regulate the transcription of genes linked with cell cycle  
181 regulation (Henrich et al., 2017; Katzen et al., 1998; Sadasivam et al., 2012; Saldivar et al.,  
182 2018; Tarasov et al., 2008), we hypothesised that the capacity of the *Mybl2*<sup>ΔΔ</sup> cells to

183 continue cycling in the presence of replication stress and DNA damage could be attributed to  
184 deregulation of the DNA damage cell cycle checkpoints. To investigate this, *Mybl2*<sup>+/+</sup> and  
185 *Mybl2*<sup>Δ/Δ</sup> cells were treated with CPT and then DNA fibre analysis was used to monitor the  
186 DNA damage-induced suppression of new origin firing as a marker of activation of the intra-  
187 S phase checkpoint. Unexpectedly, we did not observe a reduction in new origin firing  
188 following exposure to CPT in *Mybl2*<sup>+/+</sup> ESCs, rather, the level of new origin firing increased.  
189 In ESCs lacking MYBL2, CPT treatment had no observable affect on the already high level  
190 of new origin firing (Figure 2A). This suggests that like the G1/S-phase checkpoint, murine  
191 ESCs do not retain the capacity to activate the DNA damage-induced intra-S phase  
192 checkpoint and that the observed increase in new origin firing following exposure to CPT  
193 represents an adaptive response of the cell to trigger more origin firing when faced with high  
194 levels of replication stress. In keeping with this, CPT treatment resulted in a significant  
195 slowing of DNA replication in *Mybl2*<sup>+/+</sup> ESCs, which was comparable to the replication rate of  
196 untreated *Mybl2*<sup>Δ/Δ</sup> ESCs (Figure 2B). Interestingly, the slow rate of replication of the  
197 *Mybl2*<sup>Δ/Δ</sup> ESCs was unaffected by exposure to CPT, indicating that the compromised rate of  
198 replication is sufficient to prevent any significant collisions between replication machinery  
199 and CPT-induced abortive Top1 complexes.

200

201 To assess whether ESCs were also incapable of activating the G2/M DNA damage  
202 checkpoint, again *Mybl2*<sup>+/+</sup> and *Mybl2*<sup>Δ/Δ</sup> cells were treated with CPT and then the percentage  
203 of cells passing into mitosis in the presence of DNA damage was quantified using histone H3  
204 phosphorylated on serine-10 (H3-pS10) as a marker of mitotic cells. To prevent cells  
205 traversing through mitosis, cells were treated also with colcemid, a tubulin depolymerising  
206 agent which arrests cells in metaphase (Figure 2C) (Li et al., 2005). As expected, robust  
207 activation of the G2/M checkpoint by CPT was induced in the *Mybl2*<sup>+/+</sup> ESCs as measured by  
208 a significant reduction in H3-pS10 positive cells (from 23.3% to 4.5%). Interestingly,  
209 exposure of *Mybl2*<sup>Δ/Δ</sup> ESCs to CPT failed to induce a significant reduction in H3-pS10  
210 positive cells, indicative of an inability to activate the DNA damage-induced G2/M checkpoint  
211 (Figure 2C). These data are consistent with the role of Mybl2 in regulating the G2-M  
212 transition in the presence of DNA damage.

213

214 A critical event facilitating the ability of cells to activate the G2/M checkpoint is the WEE1-  
215 dependent phosphorylation of CDK1 on tyrosine-15 (Tyr-15) (Heald et al., 1993; Watanabe  
216 et al., 1995). Therefore, to ascertain whether the G2/M checkpoint defect observed in the  
217 *Mybl2*<sup>Δ/Δ</sup> ESCs was caused by aberration regulation of CDK1, we utilised Western blotting to  
218 measure the levels of CDK1 Tyr-15 phosphorylation. Interestingly, this analysis revealed that  
219 *Mybl2*<sup>Δ/Δ</sup> ESCs exhibited reduced levels of CDK1 phosphorylated on Tyr-15 when compared

220 to *Mybl2*<sup>+/+</sup> ESCs, whilst no obvious variations in CDK1 protein levels were observed (Figure  
221 2D). As expected, inhibition of the WEE1 kinase completely abolished phospho-CDK1 levels  
222 in both the *Mybl2*<sup>+/+</sup> and *Mybl2*<sup>ΔΔ</sup> ESCs (Appendix Figure S2). To analyse the effect of  
223 additional stress upon CDK1 activity in the *Mybl2*<sup>ΔΔ</sup> ESCs, cells were treated with CPT for 4  
224 hours. Following CPT treatment, *Mybl2*<sup>+/+</sup> ESCs displayed an increase in the P-CDK1  
225 (Tyr15) levels, presumably reflecting the inhibition of CDK1 activity by cell cycle checkpoint  
226 signalling. In contrast however, CPT-treated *Mybl2*<sup>ΔΔ</sup> ESCs did not display any obvious  
227 increase in P-CDK1, consistent with these cells lacking this DNA damage-activated  
228 checkpoint response (Figure 2D). Overall, these data indicate that chronic loss of MYBL2 in  
229 ESCs results in abnormal CDK1 activity leading to a weaker G2/M cell cycle checkpoint.

230

### 231 **Reduced CHK1 activation in MYBL2-ablated ESC after exposure to DNA damage**

232 To investigate the underlying cause of the deregulated CDK1 activity in *Mybl2*<sup>ΔΔ</sup> cells, we  
233 focused on CHK1, which is the principal checkpoint kinase acting downstream of ATR and  
234 known to be important for the suppression of origin firing and cell cycle checkpoint activation  
235 through its ability to inhibit CDK1 and CDK2 (Petermann et al., 2010). Western blotting  
236 analysis of CHK1 in unperturbed conditions showed that the level of phospho-CHK1(Ser345)  
237 in the *Mybl2*<sup>ΔΔ</sup> ESCs was slightly increased compared to *Mybl2*<sup>+/+</sup> ESCs (Figure 3A), which  
238 is consistent with the increased spontaneous replication stress we have observed in these  
239 cells. Interestingly however, the level of P-CHK1 in the *Mybl2*<sup>ΔΔ</sup> ESCs was significantly  
240 reduced when compared to *Mybl2*<sup>+/+</sup> ESCs following exposure to CPT, suggesting that  
241 *Mybl2*<sup>ΔΔ</sup> ESCs can not efficiently activate CHK1 in response to certain types of genotoxic  
242 stress (Figure 3A).

243

244 To further investigate the mechanism of CHK1 activation in ESCs, cells were treated with  
245 either an ATR (AZ20) or ATM (KU60019) inhibitor for two hours before subjecting the cells to  
246 5 Gy ionizing radiation to induce DNA damage. Consistent with our previous observation,  
247 *Mybl2*<sup>ΔΔ</sup> ESCs failed to efficiently phosphorylate CHK1 after exposure to IR as compared to  
248 the WT ESCs (Figure 3B). Furthermore, as expected, treatment with the ATR inhibitor  
249 reduced the levels of P-CHK1 in the ESCs irrespective of genotype (Figure 3B). Interestingly  
250 however, treatment with the ATM inhibitor also appeared to reduce the levels of P-CHK1 in  
251 the *Mybl2*<sup>+/+</sup> but not the *Mybl2*<sup>ΔΔ</sup>, indicating not only the presence of crosstalk between ATR  
252 and ATM signalling pathways with respect to CHK1 activation in ESCs but also that a loss of  
253 MYBL2 compromises the ability of ATM to be activated (Figure 3B). Moreover, the increased  
254 levels of spontaneous P-CHK1 observed in the untreated *Mybl2*<sup>ΔΔ</sup> ESCs were also reduced  
255 by the ATR inhibitor but not the ATM inhibitor (Appendix Figure S3). Altogether, our data



256 suggest that CHK1 activation is dependent on both ATR and ATM signalling and that MYBL2  
257 may function upstream of ATM to activate CHK1.

258

259 **Inhibition of ATR signalling results in severe replication stress independently of**  
260 **MYBL2**

261 Since *Mybl2*<sup>ΔΔ</sup> ESCs are unable to properly activate CHK1 in response to exogenous DNA  
262 damage, this suggests a potential role for MYBL2 in regulating the replication stress  
263 response downstream of ATM and possibly ATR. To determine whether MYBL2 acts in one  
264 or both of these replication stress response pathways, we utilised the ATR and ATM  
265 inhibitors to ascertain whether the endogenous replication stress observed in the *Mybl2*<sup>ΔΔ</sup>  
266 ESCs was epistatic with inhibition of the activity of either one of these kinases.

267

268 Initially, *Mybl2*<sup>+/+</sup> and *Mybl2*<sup>ΔΔ</sup> ESCs were treated with an ATR inhibitor for 1.5 hours before  
269 labelling active replication and performing DNA fibre analysis (Figure EV2A). In both the  
270 *Mybl2*<sup>+/+</sup> and *Mybl2*<sup>ΔΔ</sup> ESCs, ATR inhibition resulted in a highly significant decrease in the  
271 speeds of replication fork progression (Figure 3C and EV2B-C). Interestingly however, the  
272 inhibition of ATR only de-regulated replication initiation in the *Mybl2*<sup>+/+</sup> but not the *Mybl2*<sup>ΔΔ</sup>  
273 ESCs (Figure 3D and EV2D). To determine whether ATR inhibition affected fork stability, the  
274 ratio between the lengths of first- and second-labeled tracks of elongating forks was  
275 calculated. The average fork ratio in the *Mybl2*<sup>+/+</sup> ESCs treated with ATR inhibitor increased  
276 significantly when compared to that of untreated cells (Figure 3E and EV2D), whereas in  
277 contrast, fork instability only moderately increased in *Mybl2*<sup>ΔΔ</sup> ESCs following treatment with  
278 the ATR inhibitor (Figure 3E and EV2D). Overall, these findings suggest that MYBL2 may  
279 function downstream of ATR to regulate the response to replication stress in ESCs but that  
280 loss of ATR has a much greater impact on replication fork stability and elongation rates than  
281 the loss of MYBL2.

282

283 **ATM and MYBL2 function together to prevent replication stress and genome**  
284 **instability in pluripotent stem cells**

285 Given the severity of the replication stress phenotype induced following ATR inhibition  
286 relative to that present in the *Mybl2*<sup>ΔΔ</sup> ESCs, it is conceivable that either MYBL2 only  
287 functions within a subset of ATR-dependent responses to replication stress or acts within a  
288 parallel pathway that facilitates the ATR-dependent replication stress response i.e. a  
289 pathway regulated by ATM. Therefore, to further investigate a link between MYBL2 and  
290 ATM, *Mybl2*<sup>+/+</sup> and *Mybl2*<sup>ΔΔ</sup> ESCs were treated with a chemical inhibitor of ATM before the  
291 addition of IdU and CldU to label actively replicating DNA (Figure 4A). DNA fibre analysis  
292 revealed that replication fork progression in the *Mybl2*<sup>+/+</sup> ESCs was surprisingly sensitive to

293 ATM inhibition, albeit not as sensitive to ATR inhibition, with the median replication forks rate  
294 decreasing to levels similar to *Mybl2*<sup>ΔΔ</sup> ESCs (Figure 4B). Interestingly, ATM inhibition in the  
295 *Mybl2*<sup>ΔΔ</sup> ESCs had no additional effect upon replication forks progression rate (Figure 4B)  
296 indicating that the spontaneous replication stress present in the *Mybl2*<sup>ΔΔ</sup> ESCs most likely  
297 arises as a consequence of a compromised ATM-dependent replication stress response  
298 pathway. Consistent with ATM and MYBL2 functioning in the same pathway, inhibition of  
299 ATM led to a significant increase in replication fork asymmetry and new origin firing in  
300 *Mybl2*<sup>+/+</sup> ESCs but not the *Mybl2*<sup>ΔΔ</sup> ESCs (Figure 4C-D), which was not due to any  
301 alterations in cell cycle profile (Figure EV3). However, in keeping with ATR playing a  
302 predominant role in controlling the replication stress response in ESCs and ATM facilitating  
303 this, combined inhibition of ATR and ATM reduced replication rates in ESCs irrespective of  
304 genotype to levels comparable to those observed following inhibition of ATR alone (Figure  
305 EV2E).

306

307 To confirm that the treatment with ATM inhibitor was causing replication stress similar to that  
308 seen in the *MYBL2*<sup>ΔΔ</sup> ESCs, the formation of UFBs following exposure to the ATM inhibitor  
309 was assessed. As expected, the *Mybl2*<sup>+/+</sup> ESCs treated with ATM inhibitor accumulated  
310 under-replicated DNA, as evidenced by the high percentage of cells displaying UFB positive  
311 anaphases (70%). Notably, ATM inhibition induced UFBs in *Mybl2*<sup>+/+</sup> ESCs at a level  
312 comparable to that observed in *Mybl2*<sup>ΔΔ</sup> ESCs (Figure 4E). Next, we asked the question  
313 whether the DNA damage in the *Mybl2*<sup>ΔΔ</sup> ESCs is mimicked by ATM inhibition in WT ESCs.  
314 To test this, *Mybl2*<sup>+/+</sup> and *Mybl2*<sup>ΔΔ</sup> ESCs were treated with an ATM inhibitor before  
315 performing immunofluorescence staining for 53BP1 in cells also treated with EdU (Figure  
316 EV4A). Inhibition of ATM in the *Mybl2*<sup>+/+</sup> ESCs resulted in an increase in 53BP1 foci in EdU  
317 positive cells with a three-fold increase in the percentage of cells with more than six foci  
318 (Figure EV4B and EV4C). Interestingly, ATM inhibition in the *Mybl2*<sup>ΔΔ</sup> had no additional  
319 effect upon the already elevated levels of 53BP1 recruitment (Figure EV4B and EV4C).  
320 Together, these data suggests that MYBL2 functions upstream of ATM in ESCs to suppress  
321 replication stress and genome instability. Based on this, we treated *Mybl2*<sup>+/+</sup> and *Mybl2*<sup>ΔΔ</sup>  
322 ESCs with CPT and used Western blotting to directly monitor the activation of ATM using a  
323 phospho-specific antibody to S1987; a validated marker of ATM autoactivation. Strikingly  
324 *Mybl2*<sup>ΔΔ</sup> ESCs were unable to efficiently activate ATM following the induction of DNA  
325 damage as compared to the *Mybl2*<sup>+/+</sup> ESCs (Figure 4F). This observation serves to strength  
326 the notion that MYBL2 is stem cell-specific activator of the ATM-dependent replication stress  
327 response.

328

329 To verify our findings suggesting a role for ATM in regulating the replication stress response  
330 in ESCs without using small molecule inhibitors, we generated *Atm*<sup>-/-</sup> ESCs and used DNA  
331 fibre analysis to monitor replication stress. Interestingly, this analysis demonstrated that  
332 genetic loss of ATM gave rise to a similar reduction in replication fork speed to that which we  
333 had previously observed in the *Mybl2*<sup>+/+</sup> ESCs treated with an ATM inhibitor (Figure 4G).  
334 Importantly, this reduced replication speed was not further reduced by treating the *Atm*<sup>-/-</sup>  
335 ESC with an ATM inhibitor, demonstrating that the replication stress phenotype induced by  
336 the ATM inhibitor did not arise due to off-target effects (Figure 4G). To investigate the role of  
337 ATM in suppressing replication stress further, we sought to determine whether loss of ATM  
338 activity could also lead to deregulation of replication factories. The number of replication  
339 factories in early S-phase was scored using imaris program after cells were subjected to a  
340 short pulse of IdU. As previously reported, *Mybl2*<sup>ΔΔ</sup> ESCs displayed an increase in the  
341 number of replication factories when compared to *Mybl2*<sup>+/+</sup> ESCs (Figure 4H and EV4D).  
342 Consistent with our previous observations, both *Mybl2*<sup>+/+</sup> ESCs treated with ATM inhibitor, as  
343 well as *Atm*<sup>-/-</sup> ESCs also displayed an increase in number of replication factories (Figure 4H).  
344 Altogether, these data suggest that pluripotent stem cells rely on both the ATR and ATM  
345 kinases for proper replication progression in unperturbed conditions and that MYBL2 is a key  
346 component of the ATM replication stress response pathway in ESCs.

347

348 Whilst our data is consistent with a role for ATM in regulating replication in ESCs, since we  
349 have only used murine ESCs in our study, we felt that it was imperative to demonstrate that  
350 a similar phenomenon was also observed in other pluripotent stem cells but not in somatic  
351 cells. To investigate this, we carried out DNA fibre analysis on human induced pluripotent  
352 stem cells (iPSC) and primary/immortalised mouse embryonic fibroblasts (MEFs) in the  
353 presence or absence of an ATM or ATR inhibitor. Consistent with our findings using murine  
354 ESCs, both the ATM and ATR inhibitors induced a significant reduction in replication fork  
355 speed in the human iPSCs (Figure 4I and Appendix Figure S4A). However interestingly, the  
356 ATM inhibitor did not result in a significant reduction in fork speed in the primary and  
357 immortal MEFs (Figure 4I and Appendix Figure S4A). Moreover, similar to what we had  
358 observed in ESCs, exposure of iPSCs to the ATM inhibitor also increased the formation of  
359 UFBs (Appendix Figure S4B). These data confirm that ATM plays a role in suppressing  
360 replication stress in embryonic stem cells but not somatic cells.

361

### 362 **The replication stress phenotype in *Mybl2*<sup>ΔΔ</sup> ESCs is epistatic with loss of Mre11** 363 **nuclease activity**

364 The MRN complex (MRE11-Rad50-NBS1) is a multi-functional protein complex involved in  
365 DNA repair, DNA replication and cell cycle checkpoint activation in part through its ability to

366 sense DNA damage and activate the ATM/ATR-dependent DNA damage response.  
367 Previously it has been shown that MYBL2 interacts with the MRN complex albeit the  
368 functional significance of this remains unclear (Henrich et al., 2017). Given functional links  
369 between the MRN complex, ATM and MYBL2, we sought to investigate whether the  
370 nucleolytic activity of MRE11, which is essential for its role in regulating DNA repair, plays a  
371 role in the MYBL2-ATM-dependent replication stress response pathway in ESCs. To test  
372 this, mirin, an inhibitor of the 3' to 5' exonuclease activity of MRE11 (Dupre et al., 2008) was  
373 utilised. *Mybl2*<sup>+/+</sup> and *Mybl2*<sup>Δ/Δ</sup> ESCs were treated with mirin before treatment with IdU and  
374 CldU to label nascent DNA synthesis (Figure 5A). DNA fibre analysis was performed and the  
375 effect of mirin on replication fork rates was determined. In *Mybl2*<sup>+/+</sup> ESCs, there was a  
376 substantial decrease in replication fork rate (Figure 5B), an increase in new origin firing  
377 (Figure 5D and 5E) and elevated replication fork instability in response to mirin treatment  
378 (Figure 5D and 5F). In contrast, mirin treatment had very little impact on replication fork  
379 rates, new origin firing and replication fork stability in the *Mybl2*<sup>Δ/Δ</sup> ESCs (Figure 5C, and 5D-  
380 F). These data suggests that both MYBL2 and the MRN complex are required for activation  
381 of the ATM-dependent replication stress response in ESCs.

382

### 383 **Origin firing is deregulated in *Mybl2*<sup>Δ/Δ</sup> ESCs and ATMi-treated *Mybl2*<sup>+/+</sup> ESCs**

384 It is known that the DDR pathway primarily controls replication in response to DNA damage  
385 by regulating origin firing via modulation of CDK and CDC7 kinase activity (Costanzo et al.,  
386 2003; Patil et al., 2013; Syljuasen et al., 2005; Zeman and Cimprich, 2014). Deregulation of  
387 CDK activity has been demonstrated to be a major cause of replication stress partly due to  
388 aberrant origin firing (Anda et al., 2016; Beck et al., 2012; Petermann et al., 2010; Sorensen  
389 and Syljuasen, 2012). Since ATM/ATR-mediated inhibition of CDK1 is reduced in *Mybl2*<sup>Δ/Δ</sup>  
390 ESCs (Figure 2), we initially sought to determine whether inhibition of CDK1 or a  
391 combination of CDK2 and CDK1 could rescue the replication defect observed in *Mybl2*<sup>Δ/Δ</sup>  
392 ESCs and wild type ESC after suppression of ATM kinase activity. To investigate this, both  
393 the *Mybl2*<sup>+/+</sup> and *Mybl2*<sup>Δ/Δ</sup> ESCs were treated with a CDK1 inhibitor (RO3306) before  
394 labelling of active replication and DNA fibre spreading (Figure EV5A). Analysis of replication  
395 structures revealed a very mild rescue of the elevated origin firing observed in *Mybl2*<sup>Δ/Δ</sup>  
396 ESCs treated with CDK1 inhibitor and in *Mybl2*<sup>+/+</sup> ESCs after treatment with both CDK1  
397 inhibitor and ATM inhibitor, although, these differences were not statically significant  
398 (Figure EV5B). Moreover, inhibition of CDK1 in the *Mybl2*<sup>Δ/Δ</sup> ESCs partially normalized the  
399 replication fork speed to similar levels seen in the *Mybl2*<sup>+/+</sup> ESCs after CDK1 inhibition  
400 (Figure EV5C). Lastly, inhibition of CDK1 in ATM inhibited ESCs also resulted in a similar  
401 partial rescue of the replication progression defect (Figure EV5C). Based on this, we  
402 reasoned that a lack inhibition of origin firing following exposure to a CDK1 inhibitor could be

403 due to a compensatory effect of CDK2, thus we sought to suppress origin firing by inhibiting  
404 both CDK kinases (CDK1 and CDK2) by using the CDK1/2 inhibitor III (Higgs et al., 2015)  
405 (Figure EV5D). Similar to the CDK1i, the CDK1/2 inhibitor also did not dramatically reduce  
406 origin firing in *Mybl2*<sup>+/+</sup> ESCs (neither at 3uM nor at 25uM) but did result in a reduced rate of  
407 replication (Figure EV5E, EV5F and EV5G). In contrast, CDK1/2 inhibition in *Mybl2*<sup>ΔΔ</sup> ESCs  
408 and wild type ESCs treated with an ATMi lead to a reduction in origin firing and a partial  
409 rescue of fork speed (Figure EV5E and EV5F). From these observations, it would indicate  
410 that neither CDK1 nor CDK2 play a major role in regulating new origin firing in WT ESCs and  
411 the mild recovery of replication rates in *Mybl2*<sup>ΔΔ</sup> ESCs following CDK1/2 inhibition may arise  
412 as a consequence of the slightly better suppression of new origin firing in these cells.

413

414 In view of these results, we hypothesized that deregulation of CDC7 may underlie the  
415 increased new origin firing and reduced replication rates exhibited by *Mybl2*<sup>ΔΔ</sup> ESCs (Figure  
416 6A) (Jackson et al., 1993; Yeeles et al., 2015). To investigate this, *Mybl2*<sup>+/+</sup> and *Mybl2*<sup>ΔΔ</sup>  
417 ESCs were treated with the CDC7 inhibitor PHA-767491 (10uM) before labelling active  
418 replication forks (Figure 6B). Consistent with this hypothesis, treatment of the *Mybl2*<sup>+/+</sup> ESCs  
419 with a CDC7 inhibitor resulted in a significant decrease in new origin firing (Figure 6C).  
420 Moreover, the elevated origin firing observed in the *Mybl2*<sup>ΔΔ</sup> ESCs as well as in the *Mybl2*<sup>+/+</sup>  
421 ESCs treated with ATM inhibitor was significantly decreased to levels comparable to the  
422 *Mybl2*<sup>+/+</sup> ESC (Figure 6C). Interestingly, whilst CDC7 inhibition had very little impact on  
423 replication rates in *Mybl2*<sup>+/+</sup> ESCs, remarkably, this resulted in a complete rescue of  
424 replication fork speed in *Mybl2*<sup>ΔΔ</sup> ESCs or WT ESCs treated with an inhibitor (Figure 6D).  
425 Consistent with this observation, inhibition of CDC7 completely rescued replication fork  
426 stability in ESCs lacking Mybl2 or ATM activity (Figure 6E). Importantly, our data indicated  
427 that the CDC7-dependent increase in origin firing was not due to an increase of CDC7  
428 protein levels (Figure 6F). Together these data indicate that the elevated levels of replication  
429 stress resulting from a loss of MYBL2 or ATM activity is caused by aberrant CDC7-  
430 dependent firing of replication forks and that a replication stress response pathway regulated  
431 by MYBL2 and ATM function to modulate CDC7 activity to maintain genomic integrity (Figure  
432 7).

433

## 434 Discussion

435 ESCs possess unique cellular properties that are tailored to their vital roles for successful  
436 development of the mammalian embryo. Their capacity to differentiate into a diverse array of  
437 functionally distinct cell types means that the acquisition of detrimental mutations early in this  
438 process could have catastrophic consequences for the whole embryo (Blanpain et al., 2011).  
439 Under these circumstances, tight regulation of replication progression is paramount to

440 maintain genomic integrity in these cells. ATR has been shown to be the principal replication  
441 stress responsive kinase required to maintain fork stability (Cimprich and Cortez, 2008;  
442 Paulsen and Cimprich, 2007) and suppress the initiation of replication in the presence of  
443 damaged DNA (Costanzo et al., 2003; Patil et al., 2013; Syljuasen et al., 2005; Zeman and  
444 Cimprich, 2014). Consistent with this role, our work shows that the inhibition of ATR in both  
445 pluripotent stem cells (mouse ESCs and human iPSCs) as well as in primary and immortal  
446 somatic cells (MEFs) leads to a slow down in replication fork progression.

447

448 Importantly however, our data also demonstrates a role for ATM, which is normally activated  
449 exclusively in response to DSBs (Bakkenist and Kastan, 2003; Lee and Paull, 2004; Shiloh,  
450 2003), in regulating the replication stress response in ESCs, in part by facilitating the  
451 activation of CHK1. Whilst the mechanisms with which ATM regulates replication in ESCs  
452 have not been defined, it is clear that it does not function to suppress new origin firing and  
453 regulate elongation through the conventional CHK1-CDC25A-CDK2 DNA damage  
454 checkpoint pathway that has been identified in somatic cells (Falck et al., 2001). Rather, our  
455 data would indicate that CDC7 plays a more pivotal role in regulating replication origin firing  
456 than CDKs in ESCs but whether ATM directly or indirectly regulates CDC7 activation  
457 remains to be determined. Despite this, our work raises several interesting questions: Why is  
458 ATM required to regulate the replication stress response in ESCs and how does its  
459 activation in ESCs differ from that in somatic cells? It has been recently demonstrated that  
460 ESCs are very tolerant of high levels of replicative stress caused by a failure to complete  
461 replication in a single cell cycle. It has been suggested that the increased propensity for  
462 replication forks in ESCs to undergo reversal coupled with their high reliance on replication  
463 coupled-repair mechanisms to deal with the under-replicated DNA allows these cells to  
464 prevent fork collapse and chromosomal breakage in the face of high levels of replication  
465 stress. Based on this, it is likely that many critical regulators of DNA replication and the  
466 replication stress response will be limiting and as a consequence, factors such as ATR  
467 require aid from back up pathways, such as those regulated by ATM. Conversely, whilst  
468 ESCs actively induce replication fork reversal to maintain genome stability from the multiple  
469 rounds of discontinuous replication, it is evident that this process is not infalable and as  
470 such, DSBs do result from replication fork collapse. Therefore, it is conceivable that this is  
471 why ESCs are more reliant on ATM to respond to DNA damage arising in S-phase than  
472 somatic cells.

473

474 In relation to whether the activation of ATM in response to replication differs in ESCs from  
475 that in somatic cells, given that DSBs are generated as a result of the unusual process of  
476 replication in ESCs and that we have observed that MRN complex is required to suppress

477 replication stress, this would be consistent with the MRN complex sensing DSBs and then  
478 activating ATM. However, it is known that ESCs have a more relaxed chromatin state and  
479 that the strength of DDR activation in these cells is dependent on the level of chromatin  
480 compaction. Given that it has been previously shown that ATM can be activated in the  
481 absence of DSBs by altering chromatin accessibility (Bakkenist et al., 2003), it is possible  
482 that the increased chromatin accessibility in ESCs allows ATM to respond to a wider  
483 spectrum of DNA lesions or structures than it usually would in somatic cells where regions of  
484 eu- and heterochromatin are more clearly defined. In addition to this, we have demonstrated  
485 that the activation of the MRN-ATM-dependent replication stress response in ESCs also  
486 requires MYBL2. Whilst it is not clear why MYBL2 is required to activate the ATM-dependent  
487 replication stress response, it has been previously shown that MYBL2 binds to the MRN  
488 complex and is recruited to sites of DNA damage. However, it was suggested that MYBL2  
489 does not play a role in regulating DNA repair and this interaction was associated with  
490 activation of the DNA damage G2/M checkpoint through its ability to act as a transcription  
491 factor. In keeping with this report, we observed that *Mybl2*<sup>ΔΔ</sup> ESCs failed to properly activate  
492 the DNA damage-induced G2/M checkpoint but whether this resulted from a reduction in the  
493 expression of genes involved in the G2-M transition or a failure to properly activate CHK1  
494 remains to be determined. Nevertheless, our RNA-seq data from *Mybl2*<sup>ΔΔ</sup> ESCs did not  
495 identify any significant alterations in genes associated with DNA replication (data not shown)  
496 suggesting that in ESCs MYBL2 maybe also be functioning as a component of the  
497 replication stress response independent of its role as a transcription factor.

498

499 Whilst our work clearly demonstrates that MYBL2, in conjunction with ATM, is important for  
500 suppressing replication stress in ESCs, it is currently not clear as to what the underlying  
501 cause is. Ahuja et al. (2016) reported that the endogenous high level of replication stress  
502 present in ESCs does not arise as a consequence of high levels of oxidative damage,  
503 deoxynucleotide (dNTP) depletion or increased transcription-replication collisions but was  
504 rather due to the very short G1 phase preventing sufficient time for replication stress  
505 resolution. However, from our observations, it is clear that the loss of MYBL2 or ATM  
506 significantly increases the levels of endogenous cellular replication stress in ESCs without  
507 affecting the length of G1 phase. Interestingly, we demonstrated that the high levels of  
508 replication stress exhibited by ESCs lacking MYBL2 or ATM could be rescued by a short  
509 incubation with a CDC7 inhibitor. Although it was suggested by Ahuja et al. (2016) that the  
510 rescue of endogenous replication stress in ESCs following inhibition of CDC7 was solely due  
511 to a lengthening of G1 phase, this was achieved after ESCs were released from a transient  
512 G1 arrest imposed by an 8 h incubation with the CDC7 inhibitor (PHA-767491). In contrast,  
513 we could observe a rescue of replication rates in MYBL2 or ATM deficient ESCs after a 1.5 h

514 incubation with the same CDC7 inhibitor and at the same concentration, which is unlikely to  
515 significantly affect the duration of G1 phase.

516

517 Taken together, our work identifies ATM as a critical regulator of the replication stress  
518 response pathway in ESCs and demonstrate that MYBL2 functions to suppress replication  
519 stress, in part through its ability to activate ATM. Furthermore, we believe these findings are  
520 likely to have clinical ramifications since aberrant regulation of MYBL2 may affect the  
521 sensitivity of tumour cells to inhibitors of the ATM-dependent DNA damage response.

522

523 **Acknowledgements:** The authors wish to thank the members of the Garcia lab for advice  
524 and constructive criticisms. Dr Ruth Densham, Dr Clare Davies and Dr Martin Higgs for  
525 advice and critical reading of the manuscript; Dr Sovan Sarkar for the immortal MEFs and  
526 Professor Tatjana Stankovic for the *Atm*<sup>+/-</sup> mice. The authors also wish to thank the animal  
527 facility and cell sorter facility at the University of Birmingham. G.S.S is funded by a CR-UK  
528 Programme Grant (C17183/A23303). This work was also funded by a MRC PhD studentship  
529 to D.B and an ISSF Wellcome Trust critical data award (1000599) to P.G.

530

### 531 **Author contributions**

532 D.B conceived and performed experiments, acquired and analyzed data, and wrote the  
533 manuscript. N.V, R.A, E.G, C.W and M.M performed experiments, acquired and analyzed  
534 data. G.J.M provided reagents. E.P and A.G helped with experimental design, interpretation  
535 and critical discussion of the data. G.S.S performed experiments, helped with experimental  
536 design, interpretation and critical discussion of the data and wrote the manuscript. P.G  
537 conceived and performed experiments, acquired and analyzed data, wrote the manuscript  
538 and managed the project.

539

### 540 **Declaration of interest:**

541 The authors declare no potential conflict of interest.

542

### 543 **References**

544 Aguilera, A., and Gomez-Gonzalez, B. (2008). Genome instability: a mechanistic view of its causes  
545 and consequences. *Nat Rev Genet* 9, 204-217.  
546 Ahuja, A.K., Jodkowska, K., Teloni, F., Bizard, A.H., Zellweger, R., Herrador, R., Ortega, S., Hickson,  
547 I.D., Altmeyer, M., Mendez, J., *et al.* (2016). A short G1 phase imposes constitutive replication stress  
548 and fork remodelling in mouse embryonic stem cells. *Nat Commun* 7, 10660.  
549 Anda, S., Rothe, C., Boye, E., and Grallert, B. (2016). Consequences of abnormal CDK activity in S  
550 phase. *Cell Cycle* 15, 963-973.  
551 Bakkenist, C.J., and Kastan, M.B. (2003). DNA damage activates ATM through intermolecular  
552 autophosphorylation and dimer dissociation. *Nature* 421, 499-506.



553 Ballabeni, A., Park, I.H., Zhao, R., Wang, W., Lerou, P.H., Daley, G.Q., and Kirschner, M.W. (2011). Cell  
554 cycle adaptations of embryonic stem cells. *Proc Natl Acad Sci U S A* *108*, 19252-19257.

555 Bartek, J., Lukas, C., and Lukas, J. (2004). Checking on DNA damage in S phase. *Nat Rev Mol Cell Biol*  
556 *5*, 792-804.

557 Baumann, C., Korner, R., Hofmann, K., and Nigg, E.A. (2007). PICH, a centromere-associated SNF2  
558 family ATPase, is regulated by Plk1 and required for the spindle checkpoint. *Cell* *128*, 101-114.

559 Bayley, R., Blakemore, D., Cancian, L., Dumon, S., Volpe, G., Ward, C., Almaghrabi, R., Gujar, J.,  
560 Reeve, N., Raghavan, M., *et al.* (2018). MYBL2 Supports DNA Double Strand Break Repair in  
561 Hematopoietic Stem Cells. *Cancer Res* *78*, 5767-5779.

562 Beck, H., Nahse-Kumpf, V., Larsen, M.S., O'Hanlon, K.A., Patzke, S., Holmberg, C., Mejlvang, J., Groth,  
563 A., Nielsen, O., Syljuasen, R.G., *et al.* (2012). Cyclin-dependent kinase suppression by WEE1 kinase  
564 protects the genome through control of replication initiation and nucleotide consumption. *Mol Cell*  
565 *Biol* *32*, 4226-4236.

566 Bencokova, Z., Kaufmann, M.R., Pires, I.M., Lecane, P.S., Giaccia, A.J., and Hammond, E.M. (2009).  
567 ATM activation and signaling under hypoxic conditions. *Mol Cell Biol* *29*, 526-537.

568 Blanpain, C., Mohrin, M., Sotiropoulou, P.A., and Passegue, E. (2011). DNA-damage response in  
569 tissue-specific and cancer stem cells. *Cell Stem Cell* *8*, 16-29.

570 Broderick, R., Nieminuszczy, J., Blackford, A.N., Winczura, A., and Niedzwiedz, W. (2015). TOPBP1  
571 recruits TOP2A to ultra-fine anaphase bridges to aid in their resolution. *Nat Commun* *6*, 6572.

572 Cam, H., Easton, J.B., High, A., and Houghton, P.J. (2010). mTORC1 signaling under hypoxic  
573 conditions is controlled by ATM-dependent phosphorylation of HIF-1alpha. *Mol Cell* *40*, 509-520.

574 Cervantes, R.B., Stringer, J.R., Shao, C., Tischfield, J.A., and Stambrook, P.J. (2002). Embryonic stem  
575 cells and somatic cells differ in mutation frequency and type. *Proc Natl Acad Sci U S A* *99*, 3586-3590.

576 Chan, K.L., and Hickson, I.D. (2011). New insights into the formation and resolution of ultra-fine  
577 anaphase bridges. *Semin Cell Dev Biol* *22*, 906-912.

578 Chan, Y.W., Fugger, K., and West, S.C. (2018). Unresolved recombination intermediates lead to ultra-  
579 fine anaphase bridges, chromosome breaks and aberrations. *Nat Cell Biol* *20*, 92-103.

580 Cimprich, K.A., and Cortez, D. (2008). ATR: an essential regulator of genome integrity. *Nat Rev Mol*  
581 *Cell Biol* *9*, 616-627.

582 Coronado, D., Godet, M., Bourillot, P.Y., Tapponnier, Y., Bernat, A., Petit, M., Afanassieff, M.,  
583 Markossian, S., Malashicheva, A., Iacone, R., *et al.* (2013). A short G1 phase is an intrinsic  
584 determinant of naive embryonic stem cell pluripotency. *Stem Cell Res* *10*, 118-131.

585 Costanzo, V., Shechter, D., Lupardus, P.J., Cimprich, K.A., Gottesman, M., and Gautier, J. (2003). An  
586 ATR- and Cdc7-dependent DNA damage checkpoint that inhibits initiation of DNA replication. *Mol*  
587 *Cell* *11*, 203-213.

588 de Klein, A., Muijtjens, M., van Os, R., Verhoeven, Y., Smit, B., Carr, A.M., Lehmann, A.R., and  
589 Hoeijmakers, J.H. (2000). Targeted disruption of the cell-cycle checkpoint gene ATR leads to early  
590 embryonic lethality in mice. *Curr Biol* *10*, 479-482.

591 Dimitrova, D.S., and Berezney, R. (2002). The spatio-temporal organization of DNA replication sites is  
592 identical in primary, immortalized and transformed mammalian cells. *J Cell Sci* *115*, 4037-4051.

593 Down, C.F., Millour, J., Lam, E.W., and Watson, R.J. (2012). Binding of FoxM1 to G2/M gene  
594 promoters is dependent upon B-Myb. *Biochim Biophys Acta* *1819*, 855-862.

595 Dupre, A., Boyer-Chatenet, L., Sattler, R.M., Modi, A.P., Lee, J.H., Nicolette, M.L., Kopelovich, L.,  
596 Jasin, M., Baer, R., Paull, T.T., *et al.* (2008). A forward chemical genetic screen reveals an inhibitor of  
597 the Mre11-Rad50-Nbs1 complex. *Nat Chem Biol* *4*, 119-125.

598 Ewald, B., Sampath, D., and Plunkett, W. (2008). ATM and the Mre11-Rad50-Nbs1 complex respond  
599 to nucleoside analogue-induced stalled replication forks and contribute to drug resistance. *Cancer*  
600 *Res* *68*, 7947-7955.

601 Falck, J., Mailand, N., Syljuasen, R.G., Bartek, J., and Lukas, J. (2001). The ATM-Chk2-Cdc25A  
602 checkpoint pathway guards against radioresistant DNA synthesis. *Nature* *410*, 842-847.

603 Ferreira, J., and Carmo-Fonseca, M. (1997). Genome replication in early mouse embryos follows a  
604 defined temporal and spatial order. *J Cell Sci* *110* ( Pt 7), 889-897.

605 Fujii-Yamamoto, H., Kim, J.M., Arai, K., and Masai, H. (2005). Cell cycle and developmental  
606 regulations of replication factors in mouse embryonic stem cells. *J Biol Chem* *280*, 12976-12987.  
607 Garcia, P., Berlanga, O., Watson, R., and Frampton, J. (2005). Generation of a conditional allele of the  
608 B-myb gene. *Genesis* *43*, 189-195.  
609 Ge, X.Q., and Blow, J.J. (2010). Chk1 inhibits replication factory activation but allows dormant origin  
610 firing in existing factories. *J Cell Biol* *191*, 1285-1297.  
611 Guo, Z., Kumagai, A., Wang, S.X., and Dunphy, W.G. (2000). Requirement for Atr in phosphorylation  
612 of Chk1 and cell cycle regulation in response to DNA replication blocks and UV-damaged DNA in  
613 *Xenopus* egg extracts. *Genes Dev* *14*, 2745-2756.  
614 Heald, R., McLoughlin, M., and McKeon, F. (1993). Human wee1 maintains mitotic timing by  
615 protecting the nucleus from cytoplasmically activated Cdc2 kinase. *Cell* *74*, 463-474.  
616 Hengeveld, R.C., de Boer, H.R., Schoonen, P.M., de Vries, E.G., Lens, S.M., and van Vugt, M.A. (2015).  
617 Rif1 Is Required for Resolution of Ultrafine DNA Bridges in Anaphase to Ensure Genomic Stability.  
618 *Dev Cell* *34*, 466-474.  
619 Henrich, S.M., Usadel, C., Werwein, E., Burdova, K., Janscak, P., Ferrari, S., Hess, D., and Klempnauer,  
620 K.H. (2017). Interplay with the Mre11-Rad50-Nbs1 complex and phosphorylation by GSK3beta  
621 implicate human B-Myb in DNA-damage signaling. *Sci Rep* *7*, 41663.  
622 Higgs, M.R., Reynolds, J.J., Winczura, A., Blackford, A.N., Borel, V., Miller, E.S., Zlatanou, A.,  
623 Nieminuszczy, J., Ryan, E.L., Davies, N.J., *et al.* (2015). BOD1L Is Required to Suppress Deleterious  
624 Resection of Stressed Replication Forks. *Mol Cell* *59*, 462-477.  
625 Iwahori, S., Kohmon, D., Kobayashi, J., Tani, Y., Yugawa, T., Komatsu, K., Kiyono, T., Sugimoto, N., and  
626 Fujita, M. (2014). ATM regulates Cdt1 stability during the unperturbed S phase to prevent re-  
627 replication. *Cell Cycle* *13*, 471-481.  
628 Jackson, A.L., Pahl, P.M., Harrison, K., Rosamond, J., and Sclafani, R.A. (1993). Cell cycle regulation of  
629 the yeast Cdc7 protein kinase by association with the Dbf4 protein. *Mol Cell Biol* *13*, 2899-2908.  
630 Kapinas, K., Grandy, R., Ghule, P., Medina, R., Becker, K., Pardee, A., Zaidi, S.K., Lian, J., Stein, J., van  
631 Wijnen, A., *et al.* (2013). The abbreviated pluripotent cell cycle. *J Cell Physiol* *228*, 9-20.  
632 Katzen, A.L., Jackson, J., Harmon, B.P., Fung, S.M., Ramsay, G., and Bishop, J.M. (1998). *Drosophila*  
633 myb is required for the G2/M transition and maintenance of diploidy. *Genes Dev* *12*, 831-843.  
634 Khanna, K.K., Lavin, M.F., Jackson, S.P., and Mulhern, T.D. (2001). ATM, a central controller of  
635 cellular responses to DNA damage. *Cell Death Differ* *8*, 1052-1065.  
636 Knight, A.S., Notaridou, M., and Watson, R.J. (2009). A Lin-9 complex is recruited by B-Myb to  
637 activate transcription of G2/M genes in undifferentiated embryonal carcinoma cells. *Oncogene* *28*,  
638 1737-1747.  
639 Lee, J.H., and Paull, T.T. (2004). Direct activation of the ATM protein kinase by the  
640 Mre11/Rad50/Nbs1 complex. *Science* *304*, 93-96.  
641 Lefebvre, C., Rajbhandari, P., Alvarez, M.J., Bandaru, P., Lim, W.K., Sato, M., Wang, K., Sumazin, P.,  
642 Kustagi, M., Bisikirska, B.C., *et al.* (2010). A human B-cell interactome identifies MYB and FOXM1 as  
643 master regulators of proliferation in germinal centers. *Mol Syst Biol* *6*, 377.  
644 Li, D.W., Yang, Q., Chen, J.T., Zhou, H., Liu, R.M., and Huang, X.T. (2005). Dynamic distribution of Ser-  
645 10 phosphorylated histone H3 in cytoplasm of MCF-7 and CHO cells during mitosis. *Cell Res* *15*, 120-  
646 126.  
647 Liu, Q., Guntuku, S., Cui, X.S., Matsuoka, S., Cortez, D., Tamai, K., Luo, G., Carattini-Rivera, S.,  
648 DeMayo, F., Bradley, A., *et al.* (2000). Chk1 is an essential kinase that is regulated by Atr and  
649 required for the G(2)/M DNA damage checkpoint. *Genes Dev* *14*, 1448-1459.  
650 Lorvellec, M., Dumon, S., Maya-Mendoza, A., Jackson, D., Frampton, J., and Garcia, P. (2010). B-Myb  
651 is critical for proper DNA duplication during an unperturbed S phase in mouse embryonic stem cells.  
652 *Stem Cells* *28*, 1751-1759.  
653 Luciani, M.G., Oehlmann, M., and Blow, J.J. (2004). Characterization of a novel ATR-dependent,  
654 Chk1-independent, intra-S-phase checkpoint that suppresses initiation of replication in *Xenopus*. *J*  
655 *Cell Sci* *117*, 6019-6030.

- 656 Marheineke, K., and Hyrien, O. (2004). Control of replication origin density and firing time in  
657 *Xenopus* egg extracts: role of a caffeine-sensitive, ATR-dependent checkpoint. *J Biol Chem* **279**,  
658 28071-28081.
- 659 Martinez, I., and Dimaio, D. (2011). B-Myb, cancer, senescence, and microRNAs. *Cancer Res* **71**,  
660 5370-5373.
- 661 Maya-Mendoza, A., Moudry, P., Merchut-Maya, J.M., Lee, M., Strauss, R., and Bartek, J. (2018). High  
662 speed of fork progression induces DNA replication stress and genomic instability. *Nature* **559**, 279-  
663 284.
- 664 Moiseeva, T.N., Yin, Y., Calderon, M.J., Qian, C., Schamus-Haynes, S., Sugitani, N., Osmanbeyoglu,  
665 H.U., Rothenberg, E., Watkins, S.C., and Bakkenist, C.J. (2019). An ATR and CHK1 kinase signaling  
666 mechanism that limits origin firing during unperturbed DNA replication. *Proc Natl Acad Sci U S A* **116**,  
667 13374-13383.
- 668 Murga, M., Jaco, I., Fan, Y., Soria, R., Martinez-Pastor, B., Cuadrado, M., Yang, S.M., Blasco, M.A.,  
669 Skoultchi, A.I., and Fernandez-Capetillo, O. (2007). Global chromatin compaction limits the strength  
670 of the DNA damage response. *J Cell Biol* **178**, 1101-1108.
- 671 Olcina, M., Lecane, P.S., and Hammond, E.M. (2010). Targeting hypoxic cells through the DNA  
672 damage response. *Clin Cancer Res* **16**, 5624-5629.
- 673 Olcina, M.M., Foskolou, I.P., Anbalagan, S., Senra, J.M., Pires, I.M., Jiang, Y., Ryan, A.J., and  
674 Hammond, E.M. (2013). Replication stress and chromatin context link ATM activation to a role in  
675 DNA replication. *Mol Cell* **52**, 758-766.
- 676 Osterloh, L., von Eyss, B., Schmit, F., Rein, L., Hubner, D., Samans, B., Hauser, S., and Gaubatz, S.  
677 (2007). The human synMuv-like protein LIN-9 is required for transcription of G2/M genes and for  
678 entry into mitosis. *EMBO J* **26**, 144-157.
- 679 Ostling, O., and Johanson, K.J. (1984). Microelectrophoretic study of radiation-induced DNA damages  
680 in individual mammalian cells. *Biochem Biophys Res Commun* **123**, 291-298.
- 681 Patil, M., Pabla, N., and Dong, Z. (2013). Checkpoint kinase 1 in DNA damage response and cell cycle  
682 regulation. *Cell Mol Life Sci* **70**, 4009-4021.
- 683 Patschull, G., Walz, S., Grundl, M., Schwab, M., Ruhl, E., Baluapuri, A., Cindric-Vranesic, A., Kneitz, S.,  
684 Wolf, E., Ade, C.P., *et al.* (2019). The Myb-MuvB Complex Is Required for YAP-Dependent  
685 Transcription of Mitotic Genes. *Cell Rep* **27**, 3533-3546 e3537.
- 686 Paulsen, R.D., and Cimprich, K.A. (2007). The ATR pathway: fine-tuning the fork. *DNA Repair (Amst)*  
687 **6**, 953-966.
- 688 Petermann, E., Woodcock, M., and Helleday, T. (2010). Chk1 promotes replication fork progression  
689 by controlling replication initiation. *Proc Natl Acad Sci U S A* **107**, 16090-16095.
- 690 Rodriguez-Acebes, S., Mouron, S., and Mendez, J. (2018). Uncoupling fork speed and origin activity  
691 to identify the primary cause of replicative stress phenotypes. *J Biol Chem* **293**, 12855-12861.
- 692 Sadasivam, S., and DeCaprio, J.A. (2013). The DREAM complex: master coordinator of cell cycle-  
693 dependent gene expression. *Nat Rev Cancer* **13**, 585-595.
- 694 Sadasivam, S., Duan, S., and DeCaprio, J.A. (2012). The MuvB complex sequentially recruits B-Myb  
695 and FoxM1 to promote mitotic gene expression. *Genes Dev* **26**, 474-489.
- 696 Saldivar, J.C., Hamperl, S., Bocek, M.J., Chung, M., Bass, T.E., Cisneros-Soberanis, F., Samejima, K.,  
697 Xie, L., Paulson, J.R., Earnshaw, W.C., *et al.* (2018). An intrinsic S/G2 checkpoint enforced by ATR.  
698 *Science* **361**, 806-810.
- 699 Savatier, P., Huang, S., Szekely, L., Wiman, K.G., and Samarut, J. (1994). Contrasting patterns of  
700 retinoblastoma protein expression in mouse embryonic stem cells and embryonic fibroblasts.  
701 *Oncogene* **9**, 809-818.
- 702 Shechter, D., Costanzo, V., and Gautier, J. (2004). ATR and ATM regulate the timing of DNA  
703 replication origin firing. *Nat Cell Biol* **6**, 648-655.
- 704 Shiloh, Y. (2003). ATM and related protein kinases: safeguarding genome integrity. *Nat Rev Cancer* **3**,  
705 155-168.
- 706 Singh, N.P., McCoy, M.T., Tice, R.R., and Schneider, E.L. (1988). A simple technique for quantitation  
707 of low levels of DNA damage in individual cells. *Exp Cell Res* **175**, 184-191.

708 Sitzmann, J., Noben-Trauth, K., Kamano, H., and Klempnauer, K.H. (1996). Expression of B-Myb  
709 during mouse embryogenesis. *Oncogene* *12*, 1889-1894.

710 Sorensen, C.S., and Syljuasen, R.G. (2012). Safeguarding genome integrity: the checkpoint kinases  
711 ATR, CHK1 and WEE1 restrain CDK activity during normal DNA replication. *Nucleic Acids Res* *40*, 477-  
712 486.

713 Syljuasen, R.G., Sorensen, C.S., Hansen, L.T., Fugger, K., Lundin, C., Johansson, F., Helleday, T.,  
714 Sehested, M., Lukas, J., and Bartek, J. (2005). Inhibition of human Chk1 causes increased initiation of  
715 DNA replication, phosphorylation of ATR targets, and DNA breakage. *Mol Cell Biol* *25*, 3553-3562.

716 Tanaka, Y., Patestos, N.P., Maekawa, T., and Ishii, S. (1999). B-myb is required for inner cell mass  
717 formation at an early stage of development. *J Biol Chem* *274*, 28067-28070.

718 Tarasov, K.V., Tarasova, Y.S., Tam, W.L., Riordon, D.R., Elliott, S.T., Kania, G., Li, J., Yamanaka, S.,  
719 Crider, D.G., Testa, G., *et al.* (2008). B-MYB is essential for normal cell cycle progression and  
720 chromosomal stability of embryonic stem cells. *PLoS One* *3*, e2478.

721 Valerie, K., and Povirk, L.F. (2003). Regulation and mechanisms of mammalian double-strand break  
722 repair. *Oncogene* *22*, 5792-5812.

723 Ward, C., Volpe, G., Cauchy, P., Ptasinska, A., Almaghrabi, R., Blakemore, D., Nafria, M., Kestner, D.,  
724 Frampton, J., Murphy, G., *et al.* (2018). Fine-Tuning Mybl2 Is Required for Proper Mesenchymal-to-  
725 Epithelial Transition during Somatic Reprogramming. *Cell Rep* *24*, 1496-1511 e1498.

726 Watanabe, N., Broome, M., and Hunter, T. (1995). Regulation of the human WEE1Hu CDK tyrosine  
727 15-kinase during the cell cycle. *EMBO J* *14*, 1878-1891.

728 Wolter, P., Hanselmann, S., Pattschull, G., Schruf, E., and Gaubatz, S. (2017). Central spindle proteins  
729 and mitotic kinesins are direct transcriptional targets of MuvB, B-MYB and FOXM1 in breast cancer  
730 cell lines and are potential targets for therapy. *Oncotarget* *8*, 11160-11172.

731 Yeeles, J.T., Deegan, T.D., Janska, A., Early, A., and Diffley, J.F. (2015). Regulated eukaryotic DNA  
732 replication origin firing with purified proteins. *Nature* *519*, 431-435.

733 Zeman, M.K., and Cimprich, K.A. (2014). Causes and consequences of replication stress. *Nat Cell Biol*  
734 *16*, 2-9.

735 Zhao, B., Zhang, W.D., Duan, Y.L., Lu, Y.Q., Cun, Y.X., Li, C.H., Guo, K., Nie, W.H., Li, L., Zhang, R., *et al.*  
736 (2015). Filia Is an ESC-Specific Regulator of DNA Damage Response and Safeguards Genomic Stability.  
737 *Cell Stem Cell* *16*, 684-698.

738

739 **Figure legends**

740 **Figure 1. *Mybl2*<sup>ΔΔ</sup> ESCs display fork instability and a replication stress phenotype**  
741 **leading to unreplicated DNA, Increase replication-associated DSB and genome**  
742 **instability**

743 A) Distribution curve of replication fork rates for *Mybl2*<sup>+/+</sup> and *Mybl2*<sup>ΔΔ</sup> ESCs. Statistical  
744 analysis was performed using the Mann Whitney U test. n=6 experimental replicates. A  
745 minimum of 490 replication forks were counted. (\*\*\*\* p< 0.0001).

746 B) Left panel: representative elongating replication forks (stable and unstable). Quantification  
747 of the average IdU/CldU ratio in the *Mybl2*<sup>+/+</sup> and *Mybl2*<sup>ΔΔ</sup> ESCs. Percentage of highly  
748 unstable forks (ratio above 2) are indicated. Y-axis was cut to change scale and display  
749 large values. Statistical analysis was performed using the Mann Whitney U test. (\*\*\*\* p<  
750 0.0001).

751 At least 450 ratios were recorded from 6 experimental replicates.

752 C) The length of both CldU labels surrounding IdU tracks (newly fired origins) was measured  
753 before calculating a ratio representing symmetry around new origins. Quantification of the  
754 average positive ratio in the *Mybl2*<sup>+/+</sup> and *Mybl2*<sup>ΔΔ</sup> ESCs. Y-axis was cut to change scale and  
755 display large values. Statistical analysis was performed using the Mann Whitney U test. 55  
756 and 75 ratios were recorded in the *Mybl2*<sup>+/+</sup> and *Mybl2*<sup>ΔΔ</sup> respectively from 3 replicates (\*\*\*\*  
757 p< 0.0001).

758

759 D) Representative image showing the presence of UFB by positive Immunostaining for  
760 PICH. (Scale bar 10μm). Frequency of anaphases positive for UFBs relative to all  
761 anaphases in the *Mybl2*<sup>+/+</sup> and *Mybl2*<sup>ΔΔ</sup> ESCs. At least 75 anaphases were counted per  
762 experimental group from 3 independent experiments. Statistical analysis was performed  
763 using an unpaired two-tailed t-test (\*\*\*\* p< 0.0001).

764 E) Representative images for comets in *Mybl2*<sup>+/+</sup> and *Mybl2*<sup>ΔΔ</sup> untreated and *Mybl2*<sup>+/+</sup> and  
765 *Mybl2*<sup>ΔΔ</sup> plus CPT (20x magnification). (Scale bar 50μm).

766 F) Quantification of the mean and distributions of olive tail moments in *Mybl2*<sup>+/+</sup> and *Mybl2*<sup>ΔΔ</sup>  
767 untreated and CPT-treated. Y-axis was cut to change scale and display large values.  
768 Statistical analysis using Mann Whitney U tests. At least 300 comets were measured for  
769 each group from 5 experimental replicates (\*\*\*\* p< 0.0001).

770 G) Frequency of EdU positive cells with over 6 53BP1 foci in *Mybl2*<sup>+/+</sup>, *Mybl2*<sup>ΔΔ</sup> untreated  
771 and *Mybl2*<sup>+/+</sup> and *Mybl2*<sup>ΔΔ</sup> plus CPT. Error bars represent SEM. Statistical analysis using  
772 unpaired two-tailed t-test. At least 200 EdU positive nuclei were analysed from 4  
773 experimental repeats.

774

775

776

777 **Figure 2. MYBL2-ablated ESCs fail to activate the DNA-damaged activated, G2/M**  
778 **checkpoint**

779 A) Cells were treated for 1.5 hours with 5µM CPT, before sequential addition of IdU and  
780 CldU for 20 minutes each. Frequency of new firing origins (relative to total structures  
781 counted) from *Mybl2*<sup>+/+</sup> and *Mybl2*<sup>Δ/Δ</sup> ESCs treated or not with CPT (n=3 independent  
782 experiments; Error bars indicate SEM). Statistical analysis using two- tailed unpaired t-test.

783 (B) Distribution of replication rate in *Mybl2*<sup>+/+</sup> and *Mybl2*<sup>Δ/Δ</sup> ESC treated or not with CPT as  
784 above. Statistical analysis was carried out using unpaired Mann Whitney U tests. A minimum  
785 of 200 forks were quantified for each of the genotypes and conditions shown from 3  
786 independent repeats (\*p < 0.05; \*\*p< 0.01; \*\*\*p< 0.001; \*\*\*\* p< 0.0001).

787 C) ESCs were treated with or without CPT for 4 hours before 0.1ug/ml colcemid was added  
788 during the final 3.5 hours of treatment. Representative image of H3-pS10 positive cells  
789 (turquoise). (Scale bar 10µm). Frequency of H3-pS10 positive cells in *Mybl2*<sup>+/+</sup> and *Mybl2*<sup>Δ/Δ</sup>  
790 ESCs. Data from three independent experiments. Error bars represent SEM. Statistical  
791 analysis was carried out using a two-tailed unpaired t-test (\*p < 0.05; \*\*p< 0.01; ns= no  
792 significant).

793

794 D) P-CDK1 (Tyr15), CDK1 and Beta-actin expression levels of *Mybl2*<sup>+/+</sup> and *Mybl2*<sup>Δ/Δ</sup> ESCs  
795 with or without CPT treatment analyzed by immunoblotting. Bar graph represents average  
796 band density of P-CDK1 in *Mybl2*<sup>Δ/Δ</sup> ESCs relative to loading control and relative to the  
797 MYBL2<sup>+/+</sup> from 6 repeats. Error bars represent SEM. Statistical analysis was carried out  
798 using a two-tailed unpaired t-test (\*\*p< 0.01).

799

800 **Figure 3. Proficient ATR dependent CHK1 activation in MYBL2- ablated ESC.**

801 A) Immunoblot showing the levels of phosphorylated CHK1 (Ser345) and GAPDH in the  
802 *Mybl2*<sup>+/+</sup> and *Mybl2*<sup>Δ/Δ</sup> ESCs with or without CPT treatment (2.5µM CPT for 4 hours).

803 B) Immunoblot showing the levels of P-CHK1 (Ser345) and GADPH in irradiated *Mybl2*<sup>+/+</sup>,  
804 *Mybl2*<sup>+Δ</sup> and *Mybl2*<sup>Δ/Δ</sup> ESCs with or without 3 hours inhibitor treatment: ATR (AZ20, 5µM)  
805 and ATM (Ku60019, 10µM). Cells were also exposed to 5Gy irradiation before the final hour  
806 of inhibitor treatment.. Bar graph (lower panel) represents average band density of P-CHK1  
807 in *Mybl2*<sup>Δ/Δ</sup> ESCs relative to CHK1 and relative to untreated cells from at least two  
808 independent repeats. Error bars represent SEM. Statistical analysis was carried out using a  
809 two-tailed unpaired t-test (\*p< 0.05).

810 C) Cells were treated for 1.5 hours with 5µM AZ20, before sequential addition of IdU and  
811 CldU for 20 minutes each. Dot plot representing the effect of ATR inhibition upon replication  
812 rate in *Mybl2*<sup>+/+</sup> and *Mybl2*<sup>Δ/Δ</sup> ESC. Statistical analysis of distributions was carried out using

813 unpaired Mann Whitney U tests. A minimum of 240 forks were quantified for each of the  
814 genotypes and conditions shown from 2 independent repeats (\*\*\*\*  $p < 0.0001$ )

815 D) Frequency of new firing origins (relative to total structures counted) from *Mybl2*<sup>+/+</sup> and  
816 *Mybl2*<sup>ΔΔ</sup> ESCs treated or not with ATR inhibitor AZ20. At least 500 replication structures  
817 were counted per treatment from two independent repeats. Statistical analysis using two-  
818 tailed unpaired t-test. (\* $p < 0.05$ ; ns= no significant).

819 E) Distribution and average of IdU/CldU fork ratio in *Mybl2*<sup>+/+</sup> and *Mybl2*<sup>ΔΔ</sup> ESCs with or  
820 without ATR inhibitor treatment. Percentage of highly unstable forks (ratio above 2) are  
821 indicated. Dotted line at 1 indicates positive ratio. Y-axis was cut to change scale and display  
822 large values. Statistical analysis was carried out using the Mann Whitney U test. At least 150  
823 ratios were calculated per treatment group from two independent repeats (\* $p < 0.05$ ; \*\* $p <$   
824  $0.01$ ; \*\*\* $p < 0.001$ ; \*\*\*\*  $p < 0.0001$ ).

825

826 **Figure 4. ATM kinase and MYBL2 function to regulate replication in pluripotent stem**  
827 **cells.**

828 A) Scheme of the protocol. ESCs were treated with 10 $\mu$ M KU60019 for 1.5 hours before  
829 sequential addition of IdU and CldU for 20 minutes each. DNA was treated and visualised as  
830 previously described.

831 B) Distribution of replication rate after treatment with/without ATM inhibitor. Statistical  
832 analysis of distributions was carried out using an unpaired Mann Whitney U test. n=4. A  
833 minimum of 270 forks was measured for each condition (\*\*\*\*  $p < 0.0001$ ).

834 C) Distribution of the average IdU/CldU ratio in *Mybl2*<sup>+/+</sup> and *Mybl2*<sup>ΔΔ</sup> ESCs with or without  
835 ATM inhibitor treatment. Percentage of highly unstable forks (ratio above 2) are indicated.  
836 Dotted line at 1 indicates positive ratio. Y-axis was cut to change scale and display large  
837 values. Statistical analysis was carried out using the Mann Whitney U. At least 260 ratios  
838 were calculated per treatment group from 4 separate experiments (\*\*\*\*  $p < 0.0001$ ).

839 D) Frequency of new fired origins for *Mybl2*<sup>+/+</sup> and *Mybl2*<sup>ΔΔ</sup> ESCs with or without ATM  
840 inhibitor treatment. Error bars represent SEM. Statistical analysis was carried out using  
841 unpaired t-test. At least 500 replication structures were counted per treatment group from 4  
842 separate repeats.

843 E) Frequency of anaphases positive for UFB positive cells (based on ERCC/PICH positive  
844 immunostaining) for *Mybl2*<sup>+/+</sup>, the *Mybl2*<sup>ΔΔ</sup> and the *Mybl2*<sup>+/+</sup> treated for 2 hours with ATM  
845 inhibitor (KU60019). Data represents at least 100 anaphases from each group from 2  
846 experimental repeats. Statistical analysis was performed using an unpaired two-tailed t-test.

847

848 F) Immunoblot showing the levels of phosphorylated ATM (Ser1987) and ATM in the  
849 *Mybl2*<sup>+/+</sup> and *Mybl2*<sup>ΔΔ</sup> ESCs with or without CPT treatment (10 $\mu$ M CPT for 2 hours).

850 G) Distribution plot of replication speed in *Mybl2*<sup>+/+</sup> and *ATM*<sup>-/-</sup> ESC treated or not for 90  
851 minutes with 10μM KU60019 (ATMi), before sequential addition of IdU and CldU for 20  
852 minutes each. Statistical analysis was carried out using the Mann Whitney U test. At least  
853 200 replication forks were counted from 3 separate experiments for wild type and *ATM*<sup>-/-</sup> and  
854 two separate experiments for *ATM*<sup>-/-</sup> treated with ATM inhibitor. (\*\*\*\* p< 0.0001)

855 H) Quantification of the number of replication factories per cell for the different genotypes  
856 and treatments. A minimum of 65 early S-phase nuclei were counted per condition from two  
857 independent repeats. Statistical analysis was performed using a two-tailed unpaired unequal  
858 variance t-test. (\*\*\*\* p< 0.0001)

859 I) Distribution plot of replication speed in human iPSC and MEFs (primary and immortal).  
860 Statistical analysis was carried out using the Mann Whitney U test. At least 400 replication  
861 forks for iPSC, 200 for primary MEFs and 250 for immortal MEFs were counted from 3  
862 independent experiments. (\*\*\*\* p< 0.0001)

863

864

865 **Figure 5. Replication speed phenotype in *Mybl2*<sup>Δ/Δ</sup> ESCs is epistatic with loss of MRE-**  
866 **11 nuclease activity.**

867 A) Scheme of the procedure before DNA spreading. Cells were treated for 1.5 hours with  
868 20uM MRe11 inhibitor (Mirin), before sequential addition of IdU and CldU for 20 minutes  
869 each.

870 B and C) Distribution curve of replication fork rates for *Mybl2*<sup>+/+</sup> and *Mybl2*<sup>Δ/Δ</sup> ESCs treated  
871 with mirin. Statistical analysis was performed using the Mann Whitney U test. n=3  
872 experimental replicates. The value of the mean fork length is indicated above arrow (\*\*\*\* p<  
873 0.0001)

874 D) Representative images of new firing origins, and elongating forks showing stable  
875 replication and fork instability.

876 E) Frequency of new firing origins (relative to total structures counted) from *Mybl2*<sup>+/+</sup> and  
877 *Mybl2*<sup>Δ/Δ</sup> ESCs treated or not with Mirin. At least 450 replication structures were counted per  
878 treatment from 3 independent repeats. Error bars represent SEM. Statistical analysis using  
879 two-tailed unpaired t-test.

880 F) Distribution and the average IdU/CldU ratio in *Mybl2*<sup>+/+</sup> and *Mybl2*<sup>Δ/Δ</sup> ESCs with or without  
881 MRE11 inhibitor treatment. The length of both incorporated labels for each elongating fork  
882 was measured in μm and the positive ratio was calculated. Percentage of highly unstable  
883 forks (ratio above 2) are indicated. Dotted line at 1 indicates positive ratio. Y-axis was cut to  
884 change scale and display large values. Statistical analysis was carried out using the Mann  
885 Whitney U test. At least 260 ratios were calculated per treatment group from 3 separate  
886 experiments. (\*\*\*\* p< 0.0001)



887

888 **Figure 6. The replication defect observed after ATM inhibition and in *Mybl2*<sup>ΔΔ</sup> ESCs is**  
889 **due to deregulation of cell cycle associated replication initiation control.**

890 A, B) Scheme of the aim and procedure before DNA spreading. Cells were treated for 1.5  
891 hours with ATM inhibitor (KU60019) or CDC7 inhibitor (PHA-767491) alone or in  
892 combination, before sequential addition of IdU and CldU for 20 minutes each.

893 C ) Frequency of new firing origins (relative to total structures counted) from *Mybl2*<sup>+/+</sup> and  
894 *Mybl2*<sup>ΔΔ</sup> ESCs treated or not with the indicated inhibitors: CDC7 inhibitor (PHA-767491)  
895 and/or ATM inhibitor (Ku60019). At least 300 replication structures were counted per  
896 treatment. Error bars represent SEM. Statistical analysis using two- tailed unpaired t-test (\*p  
897 < 0.05).

898 D ) Replication rate (kb/min) of *Mybl2*<sup>+/+</sup> and *Mybl2*<sup>ΔΔ</sup> ESCs treated with the indicated  
899 inhibitors. Statistical analysis was carried out using an unpaired Mann Whitney U test (\*\*\*\*  
900 p< 0.0001). Minimum three independent experiments. At least 270 forks were scored for  
901 non-ATM inhibitor treated groups, and a minimum of 130 for ATM inhibitor treated groups.

902 E ) Fork stability (average IdU/CldU ratio) of *Mybl2*<sup>+/+</sup> ESC and *Mybl2*<sup>ΔΔ</sup> ESCs treated with  
903 the indicated inhibitors alone or in combination. At least 240 ratios were calculated for non-  
904 ATM inhibitor treated groups, and a minimum of 130 for ATM inhibitor treated groups. Y-axis  
905 was cut to change scale and display large values. Statistical analysis was carried out using  
906 Mann Whitney U test (\*\*\*\* p< 0.0001).

907 Data for *Mybl2*<sup>+/+</sup> ESCs treated with ATM inhibitor alone or in combination with CDC7  
908 inhibitor, was collected from two independent experiments. For the rest of the conditions, a  
909 minimum of three independent repeats was performed.

910 F) Immunoblot showing the levels of CDC7 and actin in the *Mybl2*<sup>+/+</sup> and *Mybl2*<sup>ΔΔ</sup> ESCs.

911

912 **Figure 7.** Schematic summary of our findings.

913

914 **Expanded view Figure Legends**

915 **Figure EV1. Changes in the frequency of replication structures in *Mybl2*<sup>ΔΔ</sup> ESCs.**

916 A) Representative images of replication tracks from *Mybl2*<sup>+/+</sup>, *Mybl2*<sup>ΔΔ</sup> ESCs.

917 B) Representative images of new firing origins, and unstable elongating forks scored.

918 C-E): C) Frequency of elongating forks, D) Frequency of new firing origins and E) Frequency  
919 of first label only slowing/stalling events in *Mybl2*<sup>+/+</sup>, *Mybl2*<sup>ΔΔ</sup> ESCs calculated as a percent  
920 of all structures. Error bars represent SEM. Statistical analysis was carried out using two-  
921 tailed unpaired t-test. At least 1000 total structures were counted per condition, from 6  
922 independent repeats.

923

924 **Figure EV2. Proficient ATR activation in MYBL2-ablated ESCs.**

925 A) Scheme of the procedure before DNA spreading. Cells were treated for 1.5 hours with  
926 5uM ATR inhibitor (AZ20), before sequential addition of IdU and CldU for 20 minutes each.

927 B and C) Representative images of replication tracks from *Mybl2<sup>+/+</sup>*, *Mybl2<sup>Δ/Δ</sup>* ESCs treated  
928 and untreated with ATRi. Scale bar 10um.

929 D) Representative images of new firing origins, and instability of elongating forks scored.

930 E) Distribution of replication fork rates for *Mybl2<sup>+/+</sup>*, *Mybl2<sup>Δ/Δ</sup>* ESCs treated and untreated with  
931 ATR inhibitor AZ20 and ATMi KU66019. Statistical analysis was performed using the Mann  
932 Whitney U test (\*\*\*\*  $p < 0.0001$ ).  $n=2$  experimental replicates. A minimum of 100 replication  
933 forks were counted.

934

935 **Figure EV3. MYBL2 deficiency and ATM inhibition do not alter the ESCs cell cycle.**

936 *Mybl2<sup>+/+</sup>* and *Mybl2<sup>Δ/Δ</sup>* ESCs untreated and treated with ATM inhibitor (KU60019) for 2 hours  
937 were given BrdU (25uM) for the last hour of treatment. DNA synthesis and DNA content  
938 were assessed by flow cytometry. The proportion of the cells in the cell cycle was analysed  
939 using flowjo (untreated  $n=4$ ; ATM inhibitor treated  $n=2$  independent experiments). Error bars  
940 represent SD.

941

942 **Figure EV4. Inhibition of ATM and MYBL2 deficiency display similar number of  
943 replication factories and replication-associated genome instability.**

944 A) Scheme of the experimental design.

945 B) Frequency of EdU positive cells showing more than six 53BP1 foci. At least 150 cells  
946 were counted per group from 3 separate repeats. Error bars represent SEM. Statistical  
947 analysis using two-tailed unpaired t-test.

948 C) Representative images for *Mybl2<sup>+/+</sup>* and *Mybl2<sup>Δ/Δ</sup>* ESCs untreated and treated with ATM  
949 inhibitor (KU60019) taken at 40x magnification. DNA labelling (blue) EdU positive replicating  
950 cells (red) and 53BP1 (green). (Scale bar 10 $\mu$ m). Lower row shows merge staining. CPT  
951 treatment was used as positive control.

952 D) Representative rendering images of replication factories for the different genotypes and  
953 treatments after cells were cultured for 20 minutes in the presence of IdU. (Scale bar 5 $\mu$ m).

954

955 **Figure EV5. Replication speed phenotype in *Mybl2<sup>Δ/Δ</sup>* ESCs is partially rescued by  
956 CDK1 and CDK1/2 inhibition.**

957 A) Scheme of the aim and procedure before DNA spreading. Cells were treated for 1.5 hours  
958 with CDK1 inhibitor (RO3306), or ATM inhibitor (KU60019) alone or in combination, before  
959 sequential addition of IdU and CldU for 20 minutes each.

960 B) Frequency of new firing origins (relative to total structures counted) from *Mybl2*<sup>+/+</sup> and  
961 *Mybl2*<sup>Δ/Δ</sup> ESCs treated or not with the indicated inhibitors. At least 300 replication structures  
962 were counted per treatment. Error bars represent SEM. Statistical analysis using two- tailed  
963 unpaired t-test (ns= no significant).

964 C) Replication rate (kb/min) of *Mybl2*<sup>+/+</sup> and *Mybl2*<sup>Δ/Δ</sup> ESCs treated with the indicated  
965 inhibitors. Statistical analysis was carried out using an unpaired Mann Whitney U test ( \*\*\*\*  
966 p< 0.0001. For non-ATMi treatmentst least 300 forks were scored from four independent  
967 experiments. A minimum of 130 forks were scored for ATM inhibitor treated groups. from  
968 two independent experiments .

969 D) Scheme of the aim and procedure before DNA spreading. Cells were treated for 1.5  
970 hours with CDK1/2 inhibitor III or ATM inhibitor (KU60019) alone or in combination, before  
971 sequential addition of IdU and CldU for 20 minutes each.

972 E) Frequency of new firing origins (relative to total structures counted) from *Mybl2*<sup>+/+</sup> and  
973 *Mybl2*<sup>Δ/Δ</sup> ESCs treated or not with the indicated inhibitors. At least 200 replication structures  
974 were counted per treatment from three independent experiments. Error bars represent SEM.  
975 Statistical analysis using two- tailed unpaired t-test (\*p < 0.05; \*\*p< 0.01; ns=no significant).

976 F) Replication rate (kb/min) of *Mybl2*<sup>+/+</sup> and *Mybl2*<sup>Δ/Δ</sup> ESCs treated with the indicated  
977 inhibitors. Statistical analysis was carried out using an unpaired Mann Whitney U test (\*\*p<  
978 0.001; \*\*\*\* p< 0.0001. A minimum of 130 forks were counted from three independent  
979 experiments. T.

980 G) Frequency of new origins (relative to total stuctures counted) and replication rate (kb/min)  
981 of *Mybl2*<sup>+/+</sup> ESCs treated with 3uM of CDK1/2 inhibitor III. (n=1). A total of 100 forks were  
982 counted. Statistical analysis using two- tailed unpaired t-test.

983

984

985

986

987

988

989

990

## 991 **Methods**

### 992 **MYBL2 ablated mouse embryonic stem cells (mESCs) and ATM<sup>-/-</sup> ESCs generation and** 993 **culture conditions.**

994 New *Mybl2*<sup>Δ/Δ</sup> ESC, were generated from *Mybl2*<sup>F/Δ</sup> mESCs (Garcia et al., 2005) following the  
995 same protocol as previously described (Lorvellec et al., 2010). *Atm*<sup>-/-</sup> ESC were derived from  
996 blastocysts generated from *Atm*<sup>+/-</sup> crosses as previously described (Lorvellec et al., 2010).

997 ESC were culture over mytomycin-treated MEFs feeder layer, using the media previously  
998 described (Ward et al., 2018). *Mybl2*<sup>ΔΔ</sup> ESC used in all experiemnts were not grown past  
999 15 passages. *Atm*<sup>-/-</sup> ESC were used before passage five. Cells were regularly tested for  
1000 microplasma contamination.

#### 1001 **Inhibitors/Treatments**

1002 Cells were grown under different treatments as indicated in the figures. Colcemid Gibco,  
1003 catalogue number 15212012; used at 0.27μM. Topoisomerase I inhibitor: Camptothecin  
1004 (CPT), C9911, Sigma; used at 2.5-10μM. CDK1 inhibitor: RO3306, 4181, Tocris; used at  
1005 10μM. CDC7 inhibitor: PHA-767491, 3140, Tocris; used at 10μM. ATM inhibitor: KU60019,  
1006 CAY17502-1, Cambridge bioscience; used at 10μM. ATR inhibitor: AZ20 5198, Tocris; used  
1007 at 10μM. MRE-11 inhibitor: mirin M9948, Sigma; used at 20μM.

#### 1008 **Western blotting**

1009 Western blotting was performed following standard procedures. Lysis buffer was previously  
1010 described (Lorvellec et al., 2010). Primary antibodies: MYBL2 N19, sc724 (SCBT); P-CDK1  
1011 (Cdc2) (Tyr15), 10A11 (Cell signalling); CDK1, A17 (Boster); P-Chk1 (Ser345), 133D3  
1012 (CST); CHK1, Sc8408 (SCBT); GADPH, Ab8245 (Abcam); B-actin, Sc1616 (SCBT); ATM  
1013 2C1( Novus Biological); P-ATM (AF1655) GeneTex; CDC7, 3603 (Cell Signaling Techology).

#### 1014 **DNA fibers**

1015 Exponentially growing cells were subject to various chemical inhibitors and stress inducing  
1016 agents before labelling replicating DNA through incorporation of thymidine analogues in  
1017 culture. During labelling, all media was pre-heated to 37°C before adding to cells. Firstly,  
1018 warm ESC media containing 30μM iododeoxyuridine (IdU) (I7125, Sigma) was added for 20  
1019 minutes. Cells were washed gently with warm media before addition of media containing  
1020 300μM chlorodeoxyuridine (CldU) (C6891, Sigma) for a further 20 minutes. Cell lysis and  
1021 spreading and immunofluorescence was performed as previously described (Lorvellec et al.,  
1022 2010), using Rat anti BrdU/CldU (ab6326) and Mouse anti BrdU/IdU (ab1816) both from  
1023 Abcam. Imaging was carried out on a Leica DM6000 fluorescence microscope and images  
1024 were taken at X60 magnification. Analysis of fibres was performed using the LasX software  
1025 from Leica.

1026

1027

#### 1028 **Replication factories**

1029 ESC colonies were exposed to experiment specific treatments before addition of 20μM IdU  
1030 (I7125, Sigma) to the media for 20 minutes. Immunofluorescence wwas performed as  
1031 previously described using a mouse anti-IdU antibody (Invitrogen, MD5000) (Lorvellec et al.,  
1032 2010). Image acquisition was performed using a Zeiss LSM 780 confocal  
1033 immunofluorescence microscope. During the early stages of S phase, the nucleus presents

1034 numerous small foci throughout the nucleoplasm, whereas, in mid/late S phase cells,  
1035 replication factories aggregate at the nuclear periphery before adopting a more clumped  
1036 appearance (Dimitrova and Berezney, 2002; Ferreira and Carmo-Fonseca, 1997). Colonies  
1037 containing early replicating cells were selected and z-stack images were acquired at 100X  
1038 magnification with a distance of 0.4µm between each z slice. The images were then  
1039 converted to 3D rendered projections using Imaris (x64.3.1) (Bitplane, Zurich, Switzerland).  
1040 An automatic foci counting tool within the Imaris software was then used to automatically  
1041 quantify the number of foci per cell. This was through the spots function in the surpass tool.  
1042 Spots were defined as 'growing regions' with an estimated diameter of 0.3µm.

#### 1043 BrdU Flow cytometry

1044 Cells were treated with 25µM BrdU for 1 hour and BrdU staining detected using FITC Mouse  
1045 Anti- BrdU Set (BD Biosciences, 556028). Cells were resuspended in 10µg/ml 7-Amino-  
1046 Actinomycin D (7-AAD) (BD biosciences, 559925) for the detection of DNA content. Analysis  
1047 was performed using Flowjo.

#### 1048 **Alkaline comet assays**

1049  $5 \times 10^4$  ESCs were used per slide following the protocol previously described (Bayley et al.,  
1050 2018).

#### 1051 **Ultra-fine bridges**

1052 Experiment specific treatments were performed before washing cells with ice-cold PBS and  
1053 fixation through treatment with 4% (v/v) PFA for 10 minutes. PFA was removed through PBS  
1054 washes and formaldehyde groups were quenched through treatment with 50mM ammonium  
1055 chloride for 10 minutes. Cells were washed three times more with PBS before adding ice-  
1056 cold 100% methanol for 10 minutes. After repeating washes, cells were blocked in blocking  
1057 buffer, 10% (v/v) FBS, 1% BSA (w/v) and 0.3% (v/v) Triton X in PBS, for 1 hour at room  
1058 temperature. Antibody staining was performed using an anti-ERCC6 primary antibody  
1059 (H00054821, Abnova), 1 in 100 in blocking buffer at 4°C overnight, and an anti-rabbit Alexa  
1060 488 secondary antibody (A31565, Thermo Fisher) at 1 in 500 in blocking for 1 hour at room  
1061 temperature. Slides were mounted in prolong plus DAPI before storing at -20°C. Microscopy  
1062 was performed using a Leica DM6000 fluorescence microscope; anaphase cells were  
1063 visualised by DAPI staining and the percentage of anaphases with ultra-fine bridges was  
1064 determined for each sample.

1065

#### 1066 **Immunofluorescences**

1067 Cells were fixed in 4% paraformaldehyde for 20 minutes before washing twice in PBS.  
1068 Permeabilization and blocking was carried out through treatment with blocking buffer  
1069 containing 1% (w/v) BSA and 0.3% (v/v) triton X in PBS for 1 hour at room temperature.  
1070 Cells were then incubated with a mouse anti-H3-pS10 (9701S) primary antibody at a

1071 concentration of 1 in 200 in blocking buffer at 4°C overnight or a rabbit anti-53BP1 primary  
1072 antibody (Novus Biologicals NB100-304) at 1 in 500 in blocking buffer at 4°C overnight. A  
1073 separate slide was also incubated with an anti-mouse IgG antibody (Santa-cruz, sc2025) or  
1074 rabbit IgG (sc-2027, Santa Cruz) for an IgG control. Slides were washed twice in PBS before  
1075 incubating with goat anti-mouse Alexa 488 secondary or anti-rabbit Alexa 488 secondary  
1076 antibody (A31565, Thermo Fisher). Imaging was performed using a Leica DM6000  
1077 fluorescence microscope and images were taken at x40 magnification for 53BP1 staining or  
1078 at 20x magnification for H3-pSer10 staining. The number of 53BP1 foci per nuclei/ pr  
1079 positive nuclei for H3-P-Ser10 was counted manually using the counting plugin for Image J.  
1080 For detection of H3-pSer10, prior to fixation, ESCs were treated with 2.5µM CPT for 4 hours;  
1081 0.1ug/ml (0.27µM) colcemid was added for the final 3.5 hours to arrest cells which pass into  
1082 mitosis. Cells were immediately harvested on ice before washing in PBS and centrifugation  
1083 at 250g for 5 minutes at 4°C. 5x10<sup>4</sup> cells were cytospun at 300g for 5 minutes onto  
1084 microscope slides and air dried for 15 minutes.  
1085 For detection of 53BP1 foci, 10µM EdU (C10337, Thermo fisher) was added to cells in  
1086 culture for 1 hour before harvesting on ice and a click-IT reaction, and a “click” reaction was  
1087 performed after fixation and permeabilization prior to antibody staining.

#### 1088 **Detection of EdU through a Click reaction**

1089 Staining of incorporated EdU was performed through a ‘click’ reaction representing the  
1090 reaction between an alkyne (conjugated to EdU) and an azide (fluorescently labelled). A  
1091 reaction cocktail was made containing 86% Tris buffered saline (TBS) (50 mM Tris-Cl, pH  
1092 7.5, 150 mM NaCl), 4% (v/v) 100mM CuSO<sub>4</sub>, 0.125% (v/v) Alexa-fluor azide 594 (C10330,  
1093 Thermo Fisher) and 10% (v/v) 1M sodium ascorbate added in the order presented. 200µl of  
1094 the reaction cocktail was added to each slide under a cover slip and incubated for 30  
1095 minutes in the dark. Slides were washed several times in PBS before re-blocking for 30  
1096 minutes in blocking solution.

1097

A

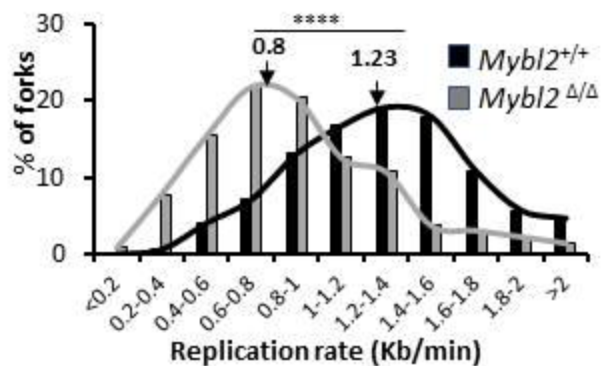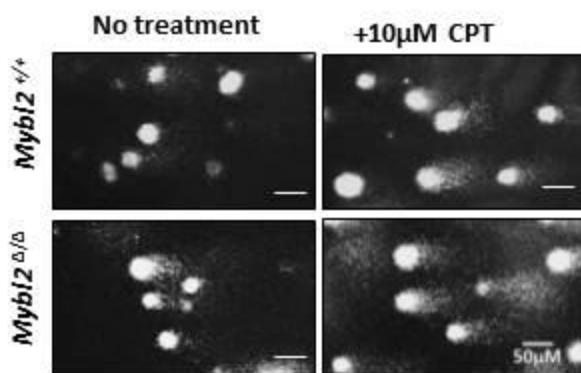

B

Elongating fork stability

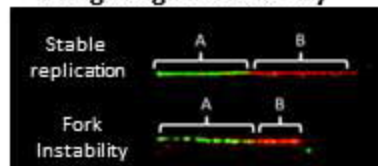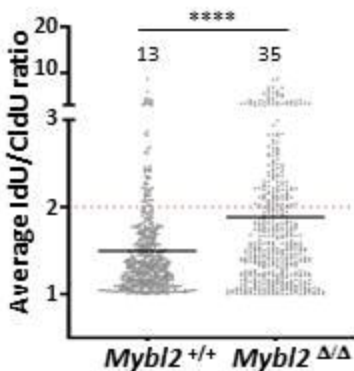

C

Symmetry around new origins

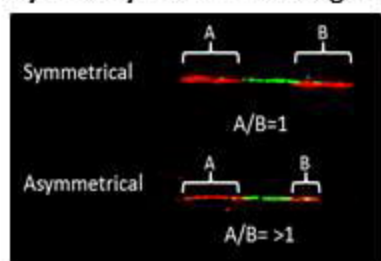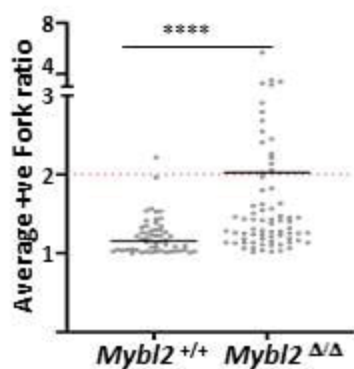

D

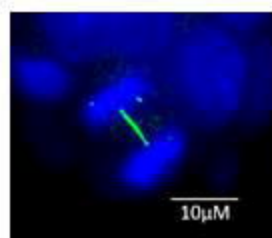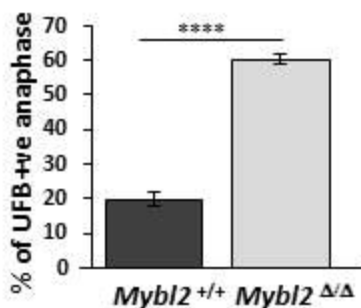

F

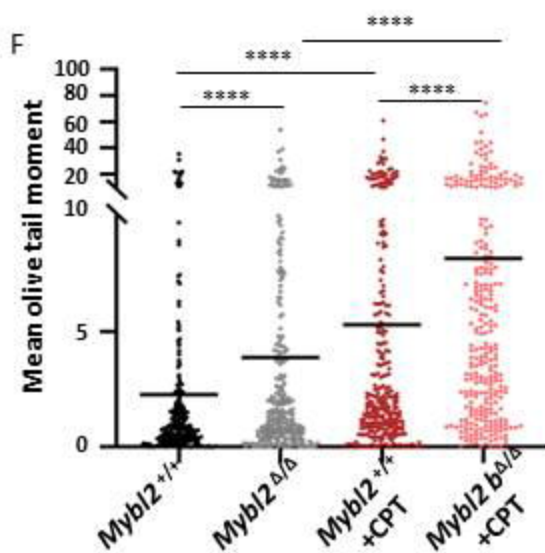

G

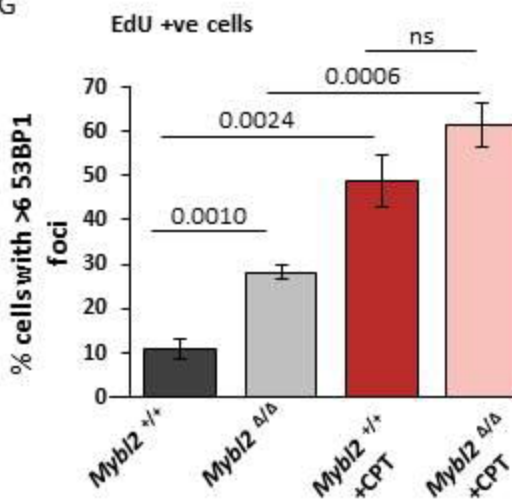

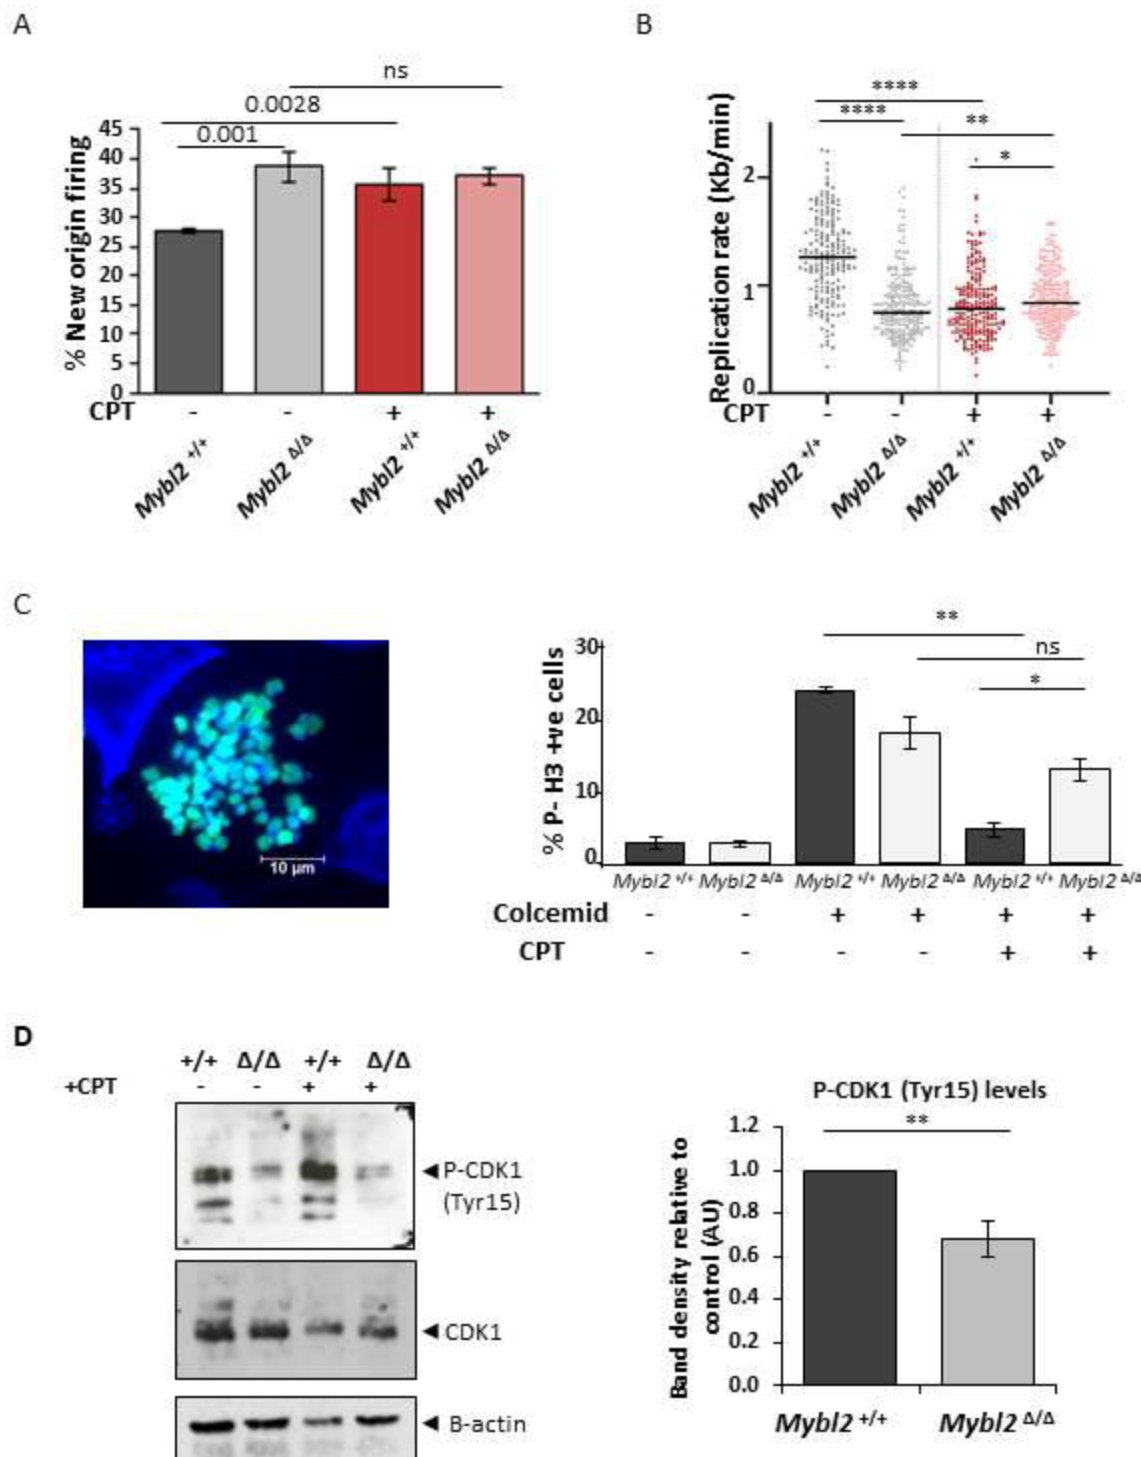



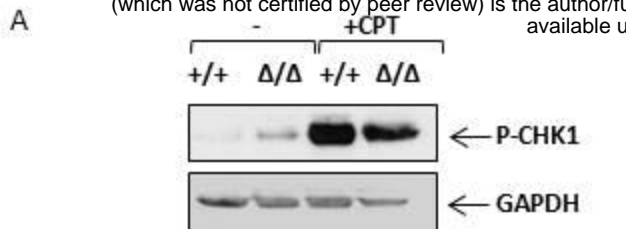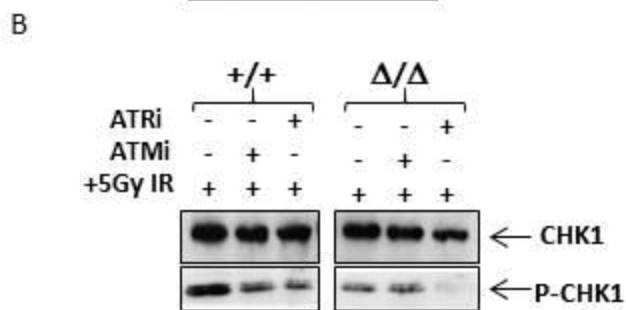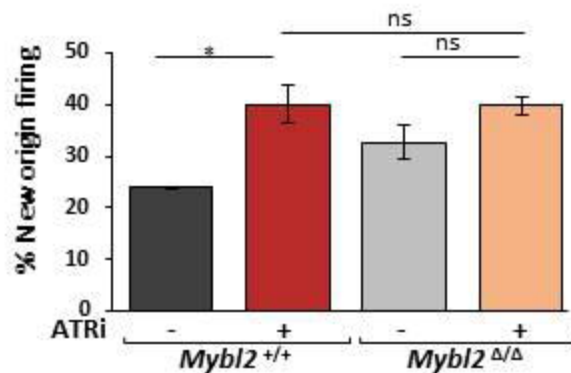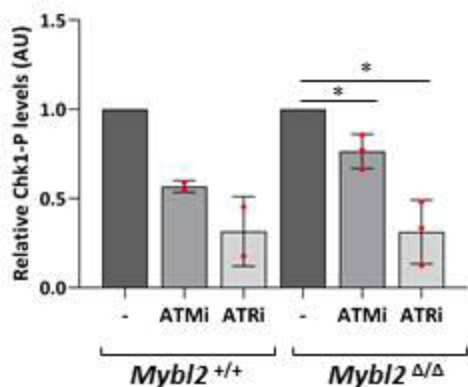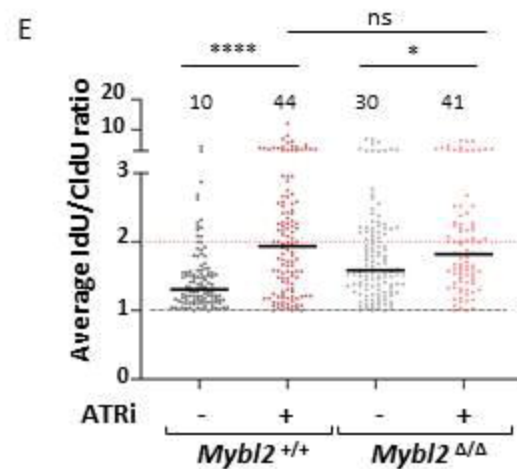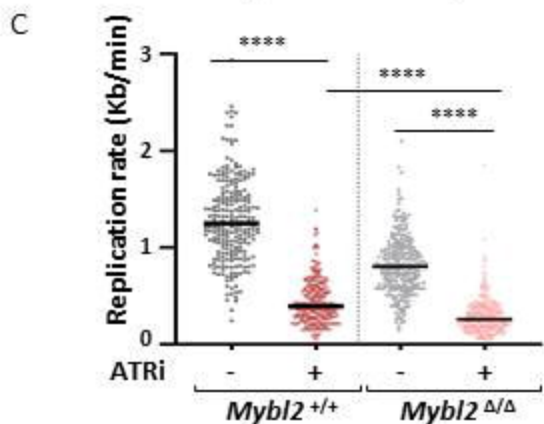

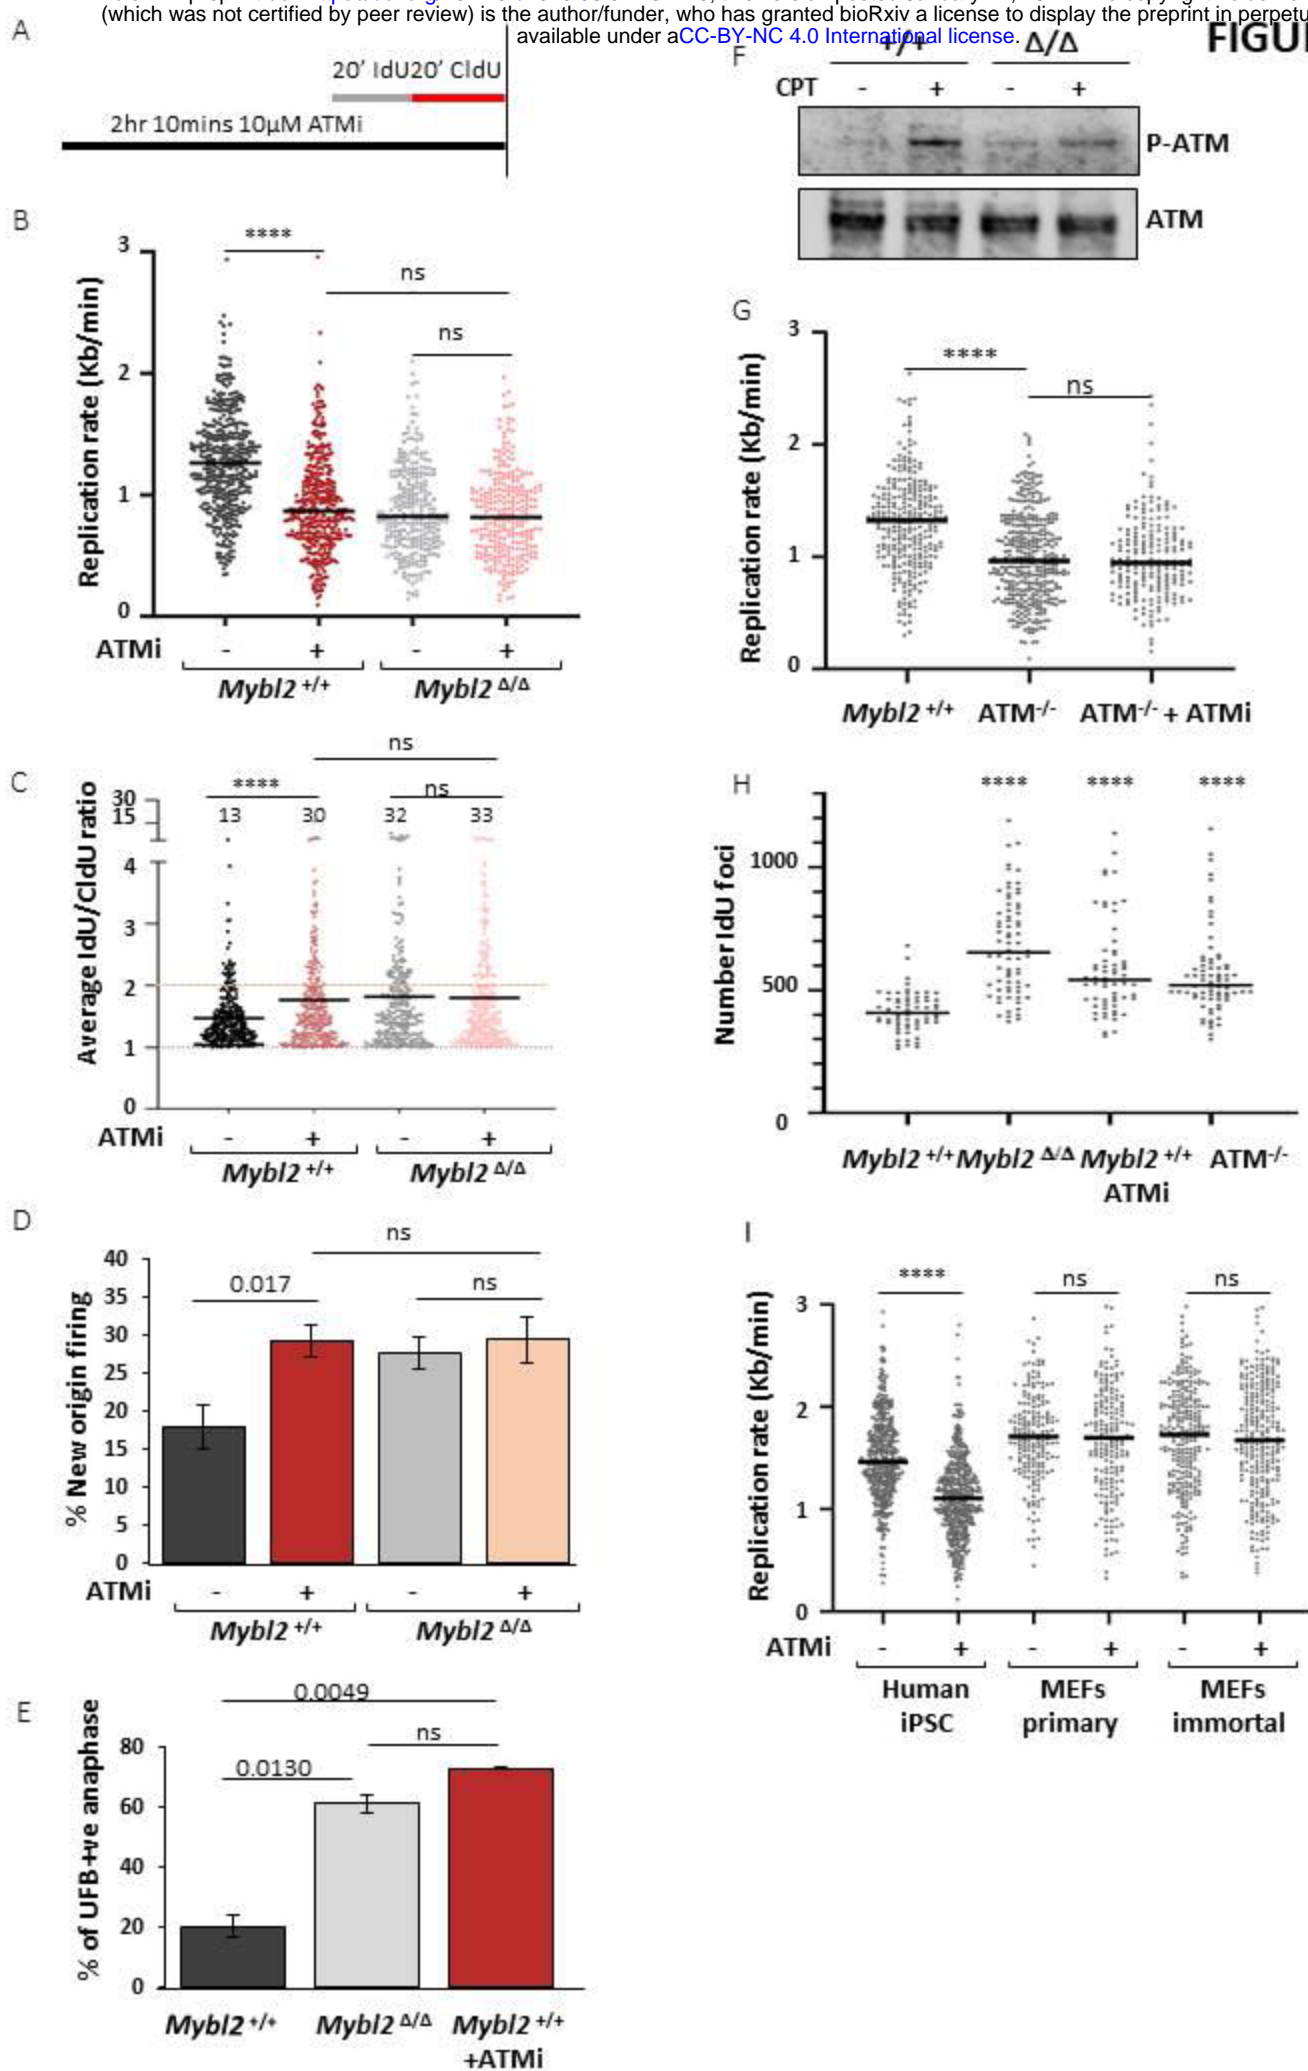

A

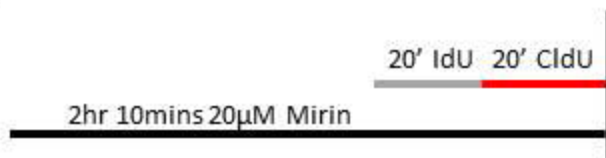

B

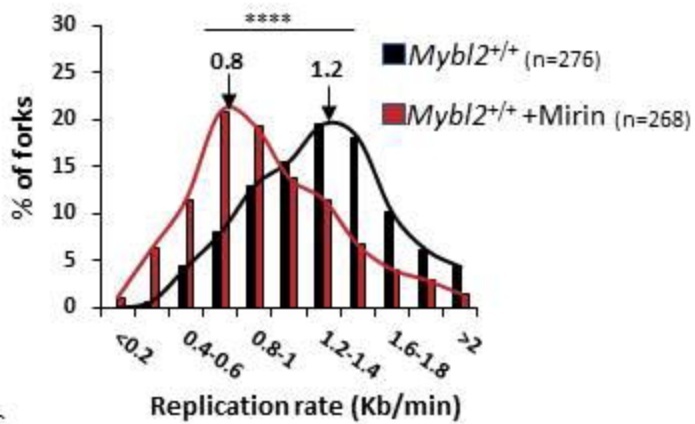

C

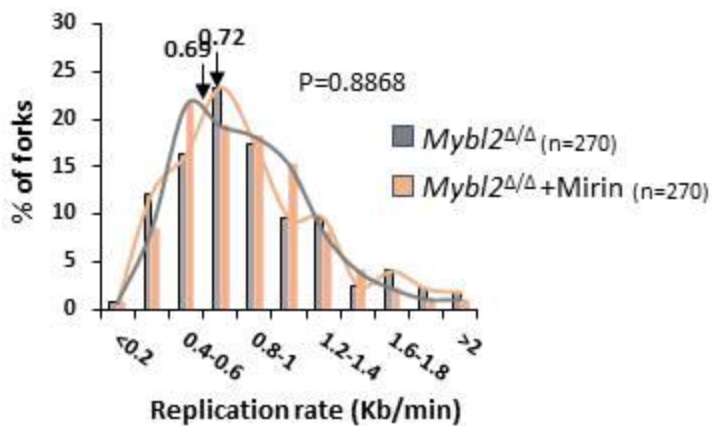

D

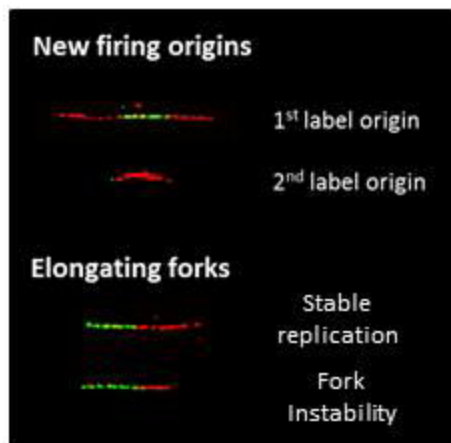

E

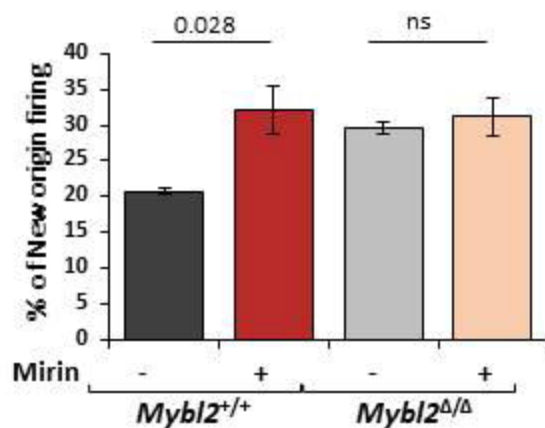

F

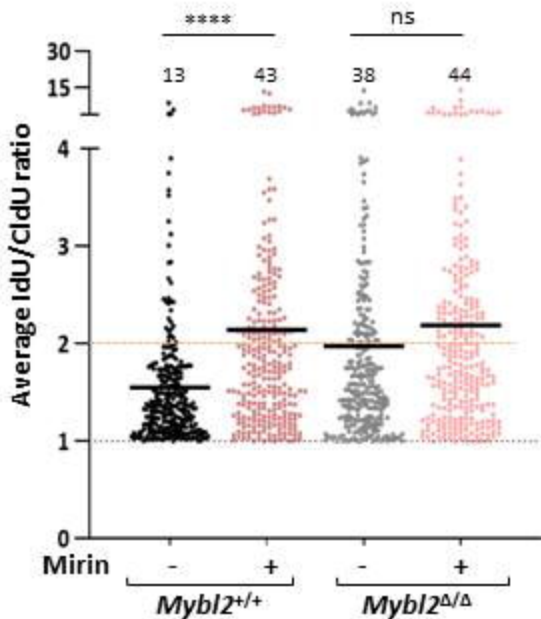

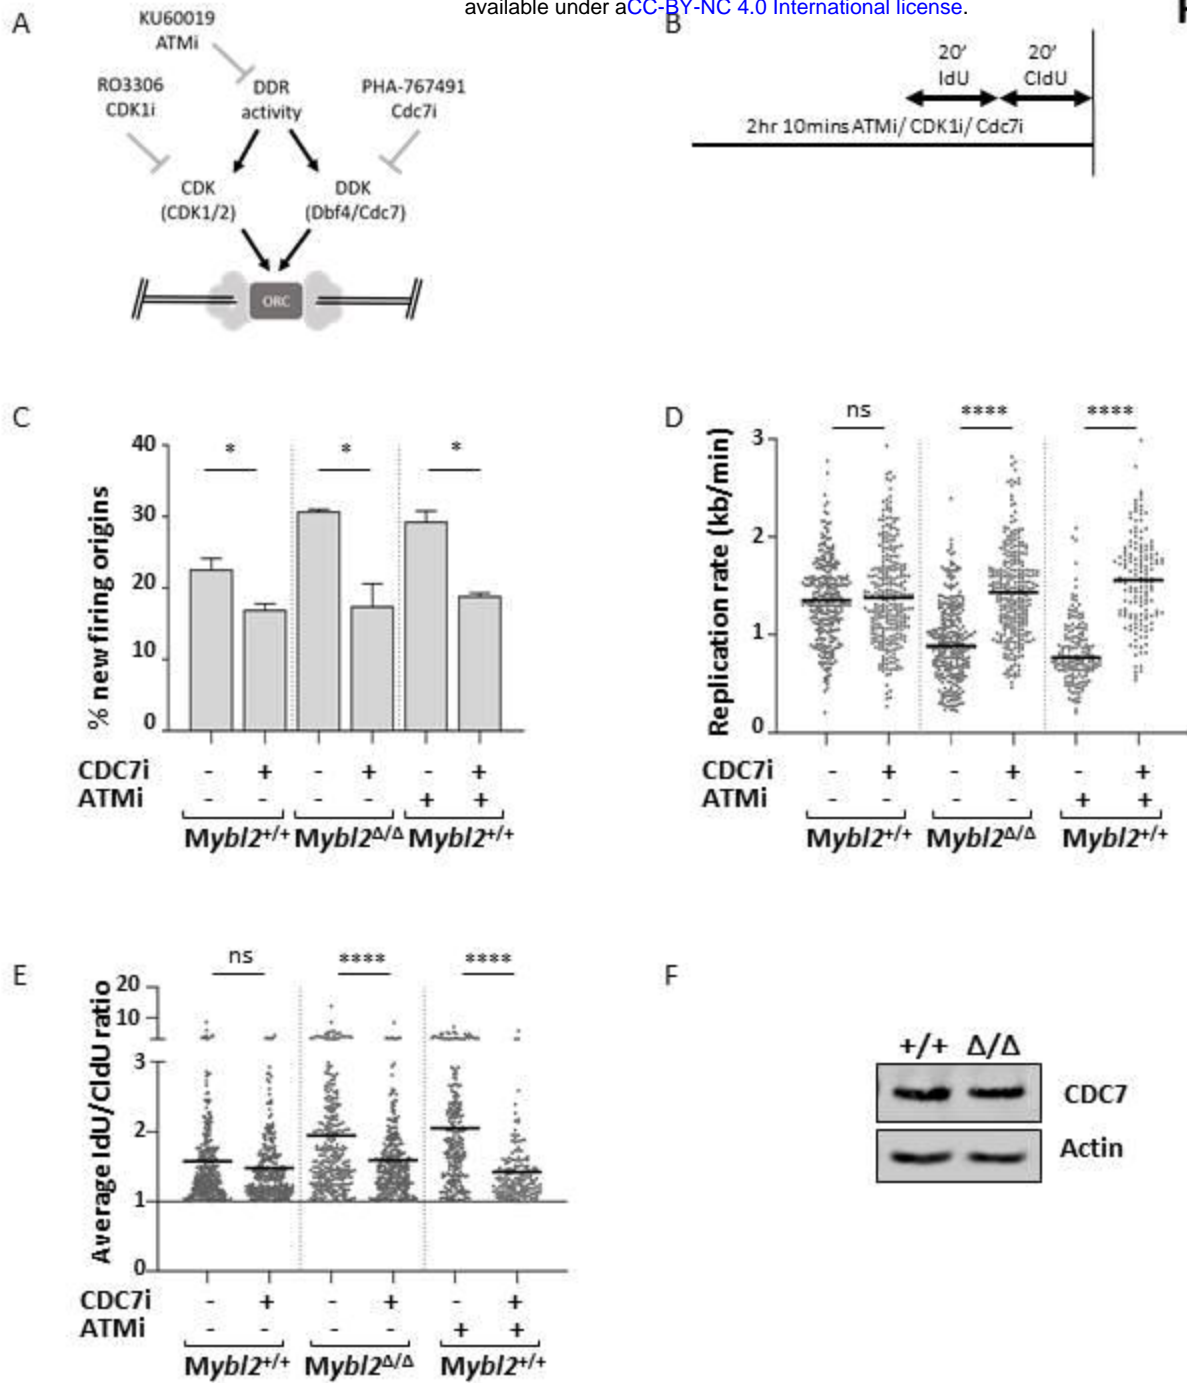

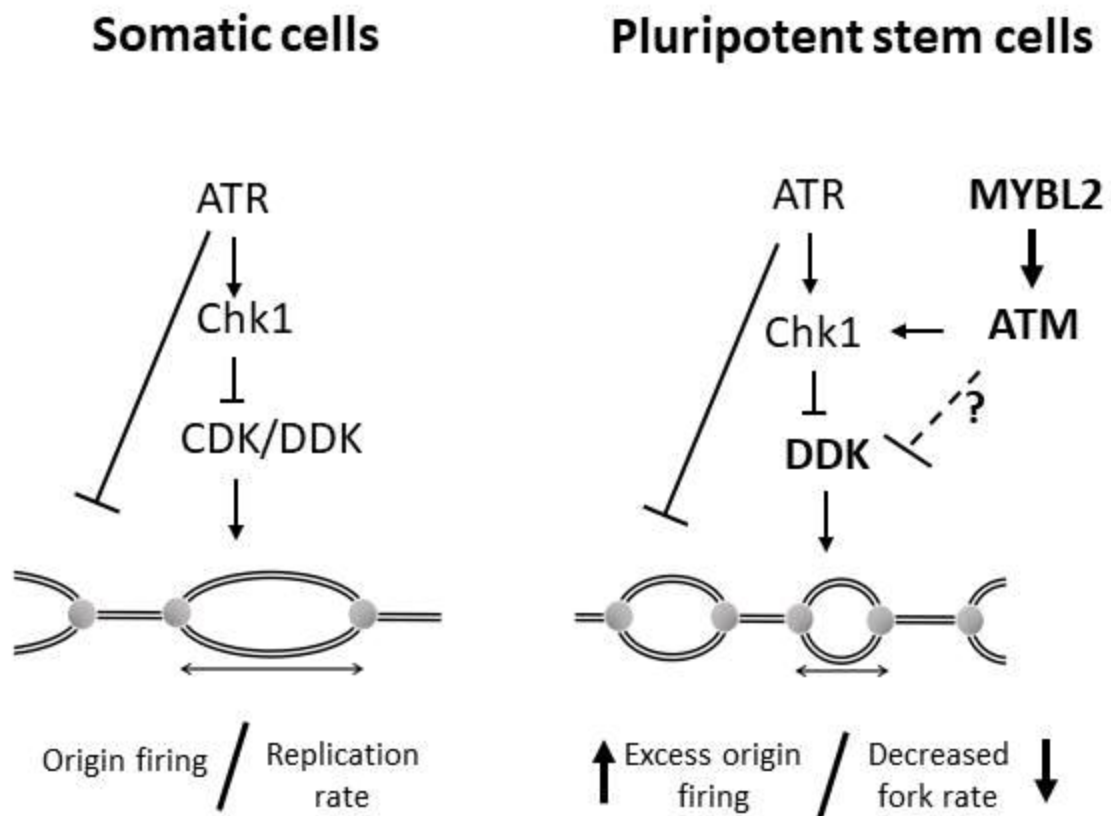

Source: https://www.biorxiv.org/content/10.1101/2020.06.04.131276v2.full.pdf
